1 **A flexible loop in the paxillin LIM3 domain mediates direct binding to integrin  $\beta 3$**

2

3 Timo Baade<sup>1,3#</sup>, Marcus Michaelis<sup>2,4#</sup>, Andreas Prestel<sup>2,5</sup>, Christoph Paone<sup>1,3</sup>, Nikolai  
4 Klishin<sup>2,4</sup>, Laura Scheinost<sup>1</sup>, Ruslan Nediakov<sup>2</sup>, Christof R. Hauck<sup>1,3\*</sup> and Heiko M.  
5 Möller<sup>2,4\*</sup>

6

7 <sup>1</sup>Lehrstuhl Zellbiologie, Universität Konstanz, 78457 Konstanz, Germany

8 <sup>2</sup>Analytische Chemie, Universität Potsdam, 14476 Potsdam, Germany

9 <sup>3</sup>Konstanz Research School Chemical Biology, Universität Konstanz, 78457  
10 Konstanz, Germany

11 <sup>4</sup>DFG Research Training Group 2473 „Bioactive Peptides“

12 <sup>5</sup>Present address: Section for Biomolecular Sciences, The Kaj Ulrik Linderstrøm-Lang  
13 Centre for Protein Science, Structural Biology and NMR laboratory, Ole Maaløes Vej  
14 5, room 3-0-37, DK-2200 Copenhagen N

15 #Authors contributed equally

16

17 \*Address correspondence to:

18 Heiko M. Möller

19 Universität Potsdam

20 Institut für Chemie

21 Karl- Liebknecht- Straße 24-25

22 D-14476 Potsdam

23 phone: +49-(0)331-977-5425

24 fax: +49-(0)331-977-5092

25 e-mail: [heiko.moeller@uni-potsdam.de](mailto:heiko.moeller@uni-potsdam.de)

26

27 Christof R. Hauck

28 Lehrstuhl Zellbiologie

29 Fachbereich Biologie

30 Maildrop 621

31 Universität Konstanz

32 Universitätsstrasse 10

33 78457 Konstanz

34 Germany

35 phone: +49-(0)7531-88-2286

36 fax: +49-(0)7531-88-4036

37 e-mail: [christof.hauck@uni-konstanz.de](mailto:christof.hauck@uni-konstanz.de)

38

39 Email addresses:

40 TB: timo.2.baade@uni-konstanz.de

41 MM: mmichael@uni-potsdam.de

42 AP: andreas.prestel@bio.ku.dk

43 CP: chpaone@aol.com

44 NK: klishin@uni-potsdam.de

45 LS: laura.scheinost@biologie.uni-freiburg.de

46 RN: ruslan.nedielkov@uni-potsdam.de

47 CRH: christof.hauck@uni-konstanz.de

48 HMM: heiko.moeller@uni-potsdam.de

49

50

51

52 **Abstract**

53 Integrins are fundamental for cell adhesion and the formation of focal adhesions (FA).  
54 Accordingly, these receptors guide embryonic development, tissue maintenance and  
55 haemostasis, but are also involved in cancer invasion and metastasis. A detailed  
56 understanding of the molecular interactions that drive integrin activation, focal  
57 adhesion assembly, and downstream signalling cascades is critical. Here, we reveal  
58 a direct association of paxillin, a marker protein of focal adhesion sites, with the  
59 cytoplasmic tails of the integrin  $\beta 1$  and  $\beta 3$  subunits. The binding interface resides in  
60 paxillin's LIM3 domain, where based on the NMR structure and functional analyses a  
61 flexible, seven amino acid loop engages the unstructured part of the integrin  
62 cytoplasmic tail. Genetic manipulation of the involved residues in either paxillin or  
63 integrin  $\beta 3$  compromises cell adhesion and motility. This direct interaction between  
64 paxillin and the integrin cytoplasmic domain identifies an alternative, kindlin-  
65 independent mode of integrin outside-in signalling particularly important for integrin  $\beta 3$   
66 function.

67

68

69 **Keywords:** Paxillin, LIM domain, integrin, kindlin2, talin, NMR spectroscopy, solution  
70 structure, chemical shift perturbation mapping, cell adhesion

71

72

## 73 **Introduction**

74 Integrins are specialized cell surface receptors of animal cells that sense the  
75 extracellular matrix and coordinate cell adhesion with the organization of the  
76 cytoskeleton (Sun et al., 2016). Integrins are transmembrane glycoproteins consisting  
77 of an  $\alpha$  and  $\beta$  subunit, with 18 distinct integrin  $\alpha$  and 8 integrin  $\beta$  subunits encoded in  
78 the human genome (Hynes, 2002). The high affinity, active conformation of these  
79 heterodimers can be stabilized either by extracellular ligand binding (outside-in  
80 signalling) or by distinct intracellular signalling processes, which allow the association  
81 of the cytosolic scaffolding proteins talin and kindlin with the  $\beta$  subunit cytoplasmic tail  
82 (inside-out signalling) (Sun et al., 2019). Active integrins together with their binding  
83 partners talin and kindlin serve as the nucleus for the initiation of large, multimeric  
84 protein complexes termed focal adhesions (FAs) (Geiger and Yamada, 2011; Moser  
85 et al., 2009). Combined biochemical, genetic and microscopic analyses have revealed  
86 the stratified layout of focal adhesions and identified the characteristic compendium of  
87 signalling and adaptor proteins, the so-called integrin adhesome (Chastney et al.,  
88 2020; Horton et al., 2015; Kanchanawong et al., 2010; Zaidel-Bar et al., 2007). While  
89 the essential roles of talin and kindlin in initiating integrin-based adhesion sites in  
90 various cell types have become clear (Bachmann et al., 2019), the function of other  
91 core adhesome proteins during the initial steps of focal adhesion formation is still  
92 debated.

93 For example, LIM (Lin-11, Isl1, MEC-3) domain containing adapter proteins are a  
94 highly enriched subgroup of integrin adhesome proteins thought to be involved in  
95 mechanosensing (Anderson et al., 2021; Horton et al., 2015; Schiller et al., 2011).  
96 Individual LIM domains encompass ~60 amino acids forming a double zinc finger  
97 motif, which mediates binding to other proteins or nucleic acids (Kadmas and

98 Beckerle, 2004; Matthews et al., 2009). A prominent member of this group of adapter  
99 proteins is paxillin, which contains four LIM domains and is ubiquitously expressed in  
100 mammalian tissues (Deakin et al., 2012; Deakin and Turner, 2008). Paxillin is  
101 commonly employed as a marker for FAs and nascent focal complexes under various  
102 conditions, even where the normal morphology, function and architecture of FAs is  
103 disturbed. Paxillin is one of the first proteins recruited to FAs (Digman et al., 2008),  
104 efficiently localizes there even in the absence of myosin-generated forces (Pasapera  
105 et al., 2010), and can recruit vinculin to FAs in talin knockout cells (Atherton et al.,  
106 2020). Paxillin is found in nanometer distance from the plasma membrane with the  
107 carboxy-terminus detected in the same confined membrane-proximal layer as the  
108 cytoplasmic domain of integrin  $\alpha$ v (Kanchanawong et al., 2010). A main determinant  
109 of paxillin's efficient recruitment to integrins seems to be its association with kindlin2,  
110 which has been mapped to the amino-terminal LD domains and the carboxy-terminal  
111 LIM4 domain of paxillin (Bottcher et al., 2017; Gao et al., 2017; Zhu et al., 2019).  
112 Interestingly, initial work identified the paxillin LIM2 and LIM3 domains as being critical  
113 for focal adhesion targeting (Brown et al., 1996). Moreover, paxillin can localize to FAs  
114 in the absence of kindlins (Klapproth et al., 2019; Theodosiou et al., 2016) suggesting  
115 additional, kindlin-independent mode(s) of integrin engagement, presumably involving  
116 paxillin LIM2 and LIM3.

117 Here, we demonstrate that the paxillin LIM2 and LIM3 domains directly interact with  
118 carboxy-terminal residues of the integrin  $\beta$  subunit. Biochemical analysis of  
119 recombinant proteins, the NMR-based 3D-structure of the paxillin LIM domains, and  
120 functional analysis of mutated paxillin and integrin  $\beta$ 3 in vitro and in the cellular context  
121 reveal that this interaction is based on a clamp-like extension in paxillin's LIM3 domain,  
122 which contributes to cellular responses towards integrin ligands.

123 **Results**

124 **Paxillin LIM2/3 domains can directly bind the cytoplasmic tails of integrin  $\beta$ 1 and**  
125  **$\beta$ 3**

126 In line with previous reports (Pasapera et al., 2010; Schiller et al., 2011), we recently  
127 observed that paxillin can be recruited in the absence of force to clusters of the integrin  
128  $\beta$  CT, similar to the behaviour of known integrin binding partners such as talin and  
129 kindlin2 (Baade et al., 2019). We wondered whether recruitment to clustered integrin  
130  $\beta$  tails is a general feature of LIM domain containing adhesome proteins. To this end,  
131 we used CEACAM-integrin  $\beta$  CT fusion proteins (CEA-ITGB1 or CEA-ITGB3), which  
132 can be engaged from the outside of the cell by multivalent CEACAM binding bacteria  
133 (*Neisseria gonorrhoeae*). This process initiates microscale accumulation of free  
134 integrin  $\beta$  tails mimicking nascent adhesion formation and was therefore named Opa  
135 protein triggered integrin clustering (OPTIC) (Suppl. Fig. S1A) (Baade et al., 2019).  
136 Interestingly, when co-expressed with CEA3-ITGB1 or CEA3-ITGB3, only paxillin and  
137 the closely related proteins Hic-5 and leupaxin showed a significant enrichment  
138 (Suppl. Fig. S1B-C). All other LIM domain proteins did not accumulate at clustered  
139 integrin  $\beta$  tails (Suppl. Fig. 1C-D). Paxillin recruitment to integrin clusters was  
140 dependent on the LIM domains, since the paxillin C-terminus encompassing LIM1-  
141 LIM4, but not the isolated N-terminal LD1-LD5 domains, strongly accumulated at  
142 integrin  $\beta$  cytoplasmic tails, and paxillin LIM1-LIM4, but not the LD1-5 domains,  
143 displaced full length paxillin from focal adhesion sites (Fig. 1A and B). These results  
144 suggest that paxillin, leupaxin and Hic-5 differ from other LIM domain containing  
145 adhesome proteins by their ability to locate at clustered integrin  $\beta$  tails and confirm the  
146 important role of the paxillin LIM domains for the specific subcellular localization.  
147 Moreover, pull-down assays with purified, recombinant proteins demonstrated that,

148 similar to the talin F3 domain and Kindlin2, the paxillin LIM2/3 domains mediate a  
149 direct interaction of this adapter protein with the cytoplasmic tails of integrin  $\beta$ 1 and  $\beta$ 3  
150 (Fig. 1C).

151

### 152 **The solution structure of paxillin LIM2/3 reveals a flexible loop region in the LIM3** 153 **domain**

154 To investigate the direct interaction between paxillin and the integrin  $\beta$  subunit in more  
155 detail, we used NMR spectroscopy to gain structural insight and to delineate the  
156 binding interface. Since LIM3 and to a lesser extent LIM2 have been shown to be  
157 mainly responsible for FA targeting of paxillin (Brown et al., 1996), we expressed the  
158 LIM2/3 tandem domain (aa380-499) of human paxillin and determined its solution  
159 structure based on heteronuclear multidimensional NMR experiments (Sattler et al.,  
160 1999). Both the LIM2 and the LIM3 domain of paxillin exhibit the characteristic double  
161 zinc finger motif as described for other LIM domain containing proteins and paxillin  
162 family members (Kadrmaz and Beckerle, 2004; Kontaxis et al., 1998; Matthews et al.,  
163 2009; Perez-Alvarado et al., 1994). Each domain comprises two orthogonally packed  
164  $\beta$ -hairpins, followed by an  $\alpha$ -helix (Fig. 1D and E). Interestingly, the LIM2 and LIM3  
165 domains are connected by a short linker of 4 amino acids (F438-K441) that provides  
166 some degree of flexibility between both domains. This would fit into the previously  
167 proposed scenario of the LIM domains as a sort of molecular ruler and/or tension  
168 sensor (Schiller et al., 2011).

169 According to the measurements of the heteronuclear NOE between HN and N of the  
170 amides, the linker between LIM2 and LIM3 shows only slightly higher flexibility on the  
171 ps-to-ns timescale than the domains themselves (Fig. S2A). But there are less long-



172 range NOE contacts in this region, suggesting that the structure is less densely packed  
173 here, resulting in differential relative orientations of the domains (Fig. 1D and E).

174 Interestingly, by analyzing the heteronuclear NOEs and the structural definition of the  
175 final ensemble of conformers, we identified a 7 amino acid stretch (F475-F481) in the  
176 second zinc-finger of the LIM3 domain that constitutes a flexible, surface exposed loop  
177 in the free protein (Fig. 1E). This loop is flanked by F475 and F481 and is situated  
178 adjacent to a hydrophobic patch or groove. In this region, the amino acid sequence  
179 and in particular residues F475, F480 and F481 are highly conserved within paxillin  
180 family members and across species (Suppl. Fig. S2B). We speculated that this flexible  
181 loop might act in concert with its opposing residues (E451, N452 and Y453) of the first  
182 zinc-finger and the hydrophobic patch to support a clamp-like mechanism for integrin  
183  $\beta$  CT binding.

184

### 185 **The C-terminal residues of integrin $\beta$ 3 cytoplasmic tail are crucial for paxillin** 186 **binding**

187 To identify the binding region of paxillin LIM2/3 on the integrin  $\beta$  CT, we titrated  
188 unlabeled paxillin LIM2/3 to  $^{15}\text{N}$  labeled cytoplasmic tails of human integrin  $\beta$ 1 (aa758-  
189 798) or  $\beta$ 3 (aa748-788), respectively. In both cases, significant chemical shift  
190 perturbations (CSPs) of specific integrin residues could be observed (Fig. 2A and B,  
191 and Suppl. Fig. S3A and B). A dissociation constant ( $K_D$ ) of  $52\pm 30$   $\mu\text{M}$  could be  
192 determined for integrin  $\beta$ 1 (Suppl. Fig. S3A), while integrin  $\beta$ 3 showed a higher  $K_D$   
193 ( $528\pm 130$   $\mu\text{M}$ ) (Fig. 2A). These findings are in line with our previous microscopic  
194 observations, where recruitment of paxillin to CEA-ITGB1 was more pronounced  
195 (Suppl. Fig. 1C). Surprisingly, when mapping the CSPs onto the primary sequence of

196 integrin  $\beta$  CTs, the interacting regions were distinct. While the highest CSPs in integrin  
197  $\beta$ 1 CT were distributed over the membrane proximal NPXY motif and a neighbouring  
198 conserved TT motif (Suppl. Fig. S3B), the largest chemical shifts in integrin  $\beta$ 3 were  
199 confined to the eight C-terminal amino acids, spanning the membrane distal NxxY  
200 motif (Fig. 2B). Indeed, deleting eight amino acids from the C-terminus of integrin  $\beta$ 3  
201 ( $\Delta$ 8aa) completely abrogated paxillin LIM2/3 binding in pulldown experiments, while  
202 deletion of the last three amino acids ( $\Delta$ 3aa) significantly reduced paxillin binding (Fig.  
203 2C). As expected, applying either of these mutant integrin  $\beta$ 3 CTs in titration  
204 experiments with paxillin LIM2/3 yielded no significant CSPs, confirming the loss of  
205 interaction (Fig. 2D and E and Suppl. Fig. S3C-D). The biochemical data were further  
206 corroborated by OPTIC assays, where both the  $\Delta$ 3aa and the  $\Delta$ 8aa mutant, but not the  
207 S778A mutation in the kindlin binding site, diminished paxillin recruitment to clustered  
208 integrin  $\beta$ 3 tails (Suppl. Fig. S3E-F).

209

## 210 **Paxillin directly associates with the C-terminus of integrin $\beta$ 3 to contribute to** 211 **cell spreading**

212 To study the physiological relevance of these mutations, we generated integrin  $\beta$ 3  
213 knockout fibroblasts via CRISPR/Cas9 and stably re-introduced either full-length  
214 integrin  $\beta$ 3 wt or one of the truncated integrin  $\beta$ 3 variants,  $\Delta$ 8aa or  $\Delta$ 3aa (Suppl. Fig.  
215 S4A and B). While integrin  $\beta$ 3-deficient cells exhibited a strongly impaired initial  
216 spreading on vitronectin- and fibronectin-coated substrates, the re-expression of  
217 integrin  $\beta$ 3 wt reverted this phenotype (Fig. 3A and B). In contrast, integrin  $\beta$ 3  $\Delta$ 3aa,  
218 and even more so integrin  $\beta$ 3  $\Delta$ 8aa re-expressing fibroblasts were still impaired in their  
219 spreading ability (Fig. 3A and B). A similar spreading defect on integrin ligands has

220 also been reported for kindlin-deficient cells and deletions of the integrin carboxy-  
221 terminus might also corrupt the kindlin binding site, indirectly affecting the recruitment  
222 of paxillin. To substantiate our biochemical findings of a direct paxillin interaction with  
223 the integrin  $\beta$  subunit, we employed kindlin1 and 2-deficient double knock-out cells  
224 (Bottcher et al., 2017; Theodosiou et al., 2016). As these cells display strongly  
225 diminished expression of integrin  $\beta$ 3, we introduced integrin  $\beta$ 3 wt, integrin  $\beta$ 3  $\Delta$ 8aa,  
226 or integrin  $\beta$ 3  $\Delta$ 3aa into the kindlin1/2 KO cells (Suppl. Fig. S4C and D). As reported  
227 before (Bottcher et al., 2017), the kindlin1/2 deficient fibroblasts hardly attached and  
228 did not spread on the vitronectin-coated substrate (Fig. 3C). However, paxillin-positive  
229 focal attachment sites appeared upon expression of integrin  $\beta$ 3 wt in the kindin1/2  
230 deficient cells, whereas no such matrix contact sites were detectable in cells  
231 expressing the truncated integrin  $\beta$ 3 mutants (Fig. 3C). The adhesions appeared upon  
232 plating of the integrin  $\beta$ 3 wt cells onto vitronectin, but not upon plating onto poly-L-  
233 lysine (Fig. 3C and Suppl. Fig. S4E), and these integrin  $\beta$ 3-mediated contacts also  
234 stained positive for talin (Fig. 3D and Suppl. Fig. S4E). Altogether, our results  
235 demonstrate that paxillin can localize to FAs in the absence of kindlins and that this  
236 process requires the paxillin binding site in the integrin  $\beta$ 3 cytoplasmic tail.

237

### 238 **The LIM3 flexible loop mediates direct association with the integrin $\beta$ 3** 239 **cytoplasmic tail**

240 To precisely identify the integrin binding site within the paxillin LIM2/3 domains, we  
241 titrated the unlabeled CT of human integrin  $\beta$ 3 to  $^{15}$ N-labelled paxillin LIM2/3. Similar  
242 to the inverse titrations, the  $K_D$  value of this interaction was determined to  $532 \pm 239$   
243  $\mu$ M (Suppl. Fig. S5A). Importantly, the most prominent CSPs in paxillin were recorded

244 within the second zinc-finger of the LIM3 domain, specifically in the flexible loop region  
245 between F475 and F481 (Fig. 4A, B and C). To verify our NMR based epitope mapping  
246 we individually mutated residues of the loop region. Interestingly, exchanging  
247 phenylalanine F475, F480, or F481 for alanine caused a complete or partial unfolding  
248 of the LIM3 domain (Suppl. Fig. S6A-F). Though these residues show strong CSPs  
249 and participate in integrin binding, these phenylalanines are also essential for  
250 maintaining the structure of the LIM domain. To gain further insight into the role of the  
251 loop region, these phenylalanines were left intact, but instead the residues between  
252 F475 and F480 were mutated to alanine (LIM2/3-4A). Paxillin LIM2/3-4A exhibited a  
253 stable LIM domain fold, however, no saturable CSPs could be detected when titrating  
254 up to millimolar concentrations of integrin  $\beta 3$  to  $^{15}\text{N}$ -labelled LIM2/3-4A (Suppl. Fig.  
255 S7A and B). Pulldown assays with the paxillin LIM2/3-4A mutant confirmed diminished  
256 binding to the integrin  $\beta 3$  CT (Fig. 4D). Next, we introduced the LIM3 loop mutations  
257 into full length paxillin (GFP-PXN-4A) to corrupt the direct engagement of integrin  $\beta 3$   
258 in intact cells. In addition, we generated a truncated paxillin lacking the LIM4 domain  
259 (GFP-PXN  $\Delta$ LIM4) to interfere with the kindlin-mediated indirect binding of paxillin to  
260 the integrin beta subunit. GFP-tagged paxillin wt, GFP-PXN-4A, or GFP-PXN  $\Delta$ LIM4,  
261 were re-introduced into paxillin knockout fibroblasts and their cell spreading was  
262 monitored (Fig. 4E and F). As expected, spreading of paxillin KO cells on vitronectin  
263 was strongly impaired. Re-expression of GFP-paxillin wt rescued this phenotype,  
264 whereas the GFP-PXN-4A mutant was not able to revert the spreading defect and  
265 mimicked paxillin KO cells in the first 2 h after seeding on the substrate (Fig. 4E and  
266 F). In contrast, paxillin lacking the LIM4 domain reconstituted cell spreading in a similar  
267 manner as wildtype paxillin (Fig. 4E and F). Moreover, paxillin wildtype and PXN  
268  $\Delta$ LIM4 reverted the round, circular morphology of the paxillin-knock-out fibroblasts to

269 the spindle shaped, pointed cell phenotype of the wildtype fibroblasts, whereas cells  
270 re-expressing GFP-PXN-4A retained the elevated circularity of the paxillin knock-out  
271 cells (Fig. 4E). Taken together, these results underscore the functional importance of  
272 the direct interaction between paxillin and integrin  $\beta$ 3. The clamp-like mechanism  
273 afforded by the flexible loop in paxillin's LIM3 domain could stabilize the association  
274 with the integrin  $\beta$ 3 cytoplasmic domain and modulates integrin  $\beta$ 3-initiated cellular  
275 responses.

276

## 277 Discussion

278 Although paxillin was discovered more than 30 years ago and constitutes a core focal  
279 adhesion protein, its mode of focal adhesion targeting has remained controversial.  
280 Recent biochemical approaches have pointed to an indirect association of paxillin with  
281 the integrin  $\beta 1$  and  $\beta 3$  subunits via the integrin binding partners kindlin1 or kindlin2  
282 (Gao et al., 2017; Theodosiou et al., 2016). As the association of kindlin with paxillin  
283 appears to rest on the paxillin LD repeats and the LIM4 domain (Bottcher et al., 2017;  
284 Zhu et al., 2019), these findings do not explain the central role of the LIM3 domain for  
285 focal adhesion localization, which has been delineated by microscopic observations in  
286 intact cells (Brown et al., 1996). Here, we present evidence for a direct interaction  
287 between the paxillin LIM3 domain and the cytoplasmic tails of integrin  $\beta 1$  and integrin  
288  $\beta 3$ , respectively. Together with the indirect link provided by kindlin, the intimate  
289 association of paxillin with the integrin  $\beta$  subunit now unveils the full spectrum of  
290 paxillin's focal adhesion recruitment modalities and unmask the fundamental building  
291 principles of cellular attachment sites.

292 In solution, paxillin's LIM2 and LIM3 domains adopt an overall fold consistent with  
293 available structural data for LIM domains of other proteins (Kadmas and Beckerle,  
294 2004; Kontaxis et al., 1998; Matthews et al., 2009; Perez-Alvarado et al., 1994).  
295 However, our NMR structure reveals an intriguing detail, which is conserved in paxillin  
296 orthologues from other species. Indeed, the LIM3 domain of paxillin harbours a  
297 flexible, surface exposed loop, which, based on sequence homology, is also present  
298 in the paxillin family members Hic-5 and leupaxin. This loop demarcates the integrin  
299 binding site in the LIM3 domain and appears to function as a clasp to stabilize the  
300 association of paxillin with the integrin cytoplasmic tail. This additional direct  
301 interaction between the integrin  $\beta$  cytoplasmic tail and paxillin now consolidates an

302 emerging principle of focal adhesion organization: each core component of focal  
303 adhesions, including talin, kindlin, paxillin, FAK, vinculin, and  $\alpha$ -actinin is able to  
304 sustain multiple, independent interactions with other FA components. In analogy to a  
305 steel frame construction, this kind of assembly not only allows a stepwise expansion  
306 of the protein complex, but also provides a further mechanical reinforcement with  
307 every incoming component. In the specific example of paxillin, this protein can  
308 associate via its LIM4 domain with integrin-bound kindlin2 (Zhu et al., 2019), but then  
309 paxillin will also be in place to exploit the clamping mechanism build in its LIM3 domain  
310 to bind the integrin  $\beta$  subunit and to re-enforce this tripartite complex as a pre-requisite  
311 for efficient initial cell spreading. Furthermore, as paxillin can interact via its LIM1/2  
312 domains with the talin head (Ripamonti et al., 2021) and via its LD1 domain with the  
313 talin rod region (Zacharchenko et al., 2016), there is the possibility that paxillin  
314 strengthens the early integrin-associated protein complex beyond kindlin. Indeed, a  
315 stabilization of the integrin-talin-kindlin nexus by paxillin has been observed (Gao et  
316 al., 2017). Multiple reciprocal interactions between talin, kindlin, paxillin and the  
317 integrin  $\beta$  tail would also increase the avidity and might demonstrate once more how  
318 multivalent low-affinity interactions such as those observed for paxillin LIM3 and  
319 integrin  $\beta$ 3 stabilize macromolecular networks. Indeed, the relatively low affinity  
320 between LIM3 and integrin  $\beta$ 3 might be a prerequisite for efficient assembly and  
321 disassembly of FAs.

322 Intriguingly, such reciprocal interactions between focal adhesion core components  
323 could also be the basis for the astonishing flexibility in the temporal sequence, in which  
324 these proteins can assemble at integrin cytoplasmic domains. For example, talin  
325 binding to the integrin  $\beta$  tail appears as a pre-requisite for the recruitment of its binding  
326 partner FAK (Wang et al., 2011; Zhang et al., 2008), while the opposite sequence of

327 assembly has also been reported (Lawson et al., 2012; Lawson and Schlaepfer, 2012).  
328 This behaviour is mirrored by kindlin and paxillin, as kindlin is able to recruit paxillin,  
329 while the direct binding of paxillin to the  $\beta$  subunit can turn this sequence of events on  
330 its head and could potentially allow paxillin-dependent recruitment of kindlin.  
331 Interestingly, one of the factors, which determines the order of assembly appears to  
332 be the nature of the involved integrin heterodimer. In particular, differences between  
333 integrin  $\alpha 5\beta 1$  and integrin  $\alpha \beta 3$  do not only exist with regard to the ligand spectrum,  
334 but also how they convey the ligand binding event into the cell (Bachmann et al., 2019).  
335 In this regard,  $\alpha 5\beta 1$  integrins are known to determine adhesion strength and form  
336 catch bonds with their ligands, when increasing forces are applied (Kong et al., 2009;  
337 Roca-Cusachs et al., 2009). The elevated binding affinity of paxillin for integrin  $\beta 1$  and  
338 its ability to associate with talin and kindlin might reflect this need to withstand high  
339 forces. Though integrin  $\alpha \beta 3$  is not able to sustain the high binding strength of  $\alpha 5\beta 1$   
340 integrin, integrin  $\alpha \beta 3$  exhibits faster binding rates and stimulates integrin  $\alpha 5\beta 1$ -  
341 mediated binding (Bharadwaj et al., 2017; Schiller et al., 2013). Interestingly, the fast  
342 binding rate of integrin  $\alpha \beta 3$  correlates with its increased ability to recruit paxillin and  
343 its propensity to initiate larger paxillin-positive adhesion sites (Bharadwaj et al., 2017;  
344 Missirlis et al., 2016). Furthermore, on patterned substrates, cell spreading and paxillin  
345 recruitment preferentially occur via the vitronectin-binding integrin  $\alpha \beta 3$  (Pinon et al.,  
346 2014). Together with our findings of a prominent recruitment of paxillin to integrin  $\beta 3$   
347 in kindlin-deficient cells and of reduced spreading of paxillin LIM3-4A expressing cells  
348 on vitronectin, all these observations suggest a particularly prominent role for the direct  
349 association of the paxillin LIM3 domain with integrin  $\beta 3$ . It is also interesting to note  
350 that the paxillin LIM3 domain appears to latch onto a specific section of the integrin  $\beta 3$   
351 subunit at the far carboxy-terminus, which shows significant chemical shift



352 perturbations upon binding. The C-terminal amino acids of integrin  $\beta$ 3 differ from all  
353 other  $\beta$  subunits making this a unique recognition site and helping to explain this  
354 peculiar interaction mode of paxillin and integrin  $\beta$ 3.

355 Though further studies are needed to delineate the stoichiometry of talin, kindlin and  
356 paxillin at clustered integrin  $\beta$  subunits, our structural elucidation of the paxillin LIM2  
357 and LIM3 domains and their association with the integrin  $\beta$  carboxy-terminus now  
358 provides the foundation to probe and manipulate the functional contribution of paxillin  
359 to matrix adhesion and cell spreading.

360

361

## 362 **Material & Methods**

### 363 Antibodies and dyes

364 The following primary and secondary antibodies were used at indicated  
365 concentrations: anti-human  $\alpha$ -actinin1 (mouse monoclonal, BM75.2, Sigma Aldrich,  
366 A5044; WB 1:1000), anti-human talin (mouse monoclonal, 8d4, Sigma Aldrich, T3287;  
367 WB 1:750), anti-human FAK (rabbit polyclonal, A-17, Santa Cruz, sc-557; WB 1:250),  
368 anti-human kindlin2 (mouse monoclonal, 3A3, Merck, MAB2617; WB 1:1000, IF  
369 1:200), anti-mouse kindlin2 (rabbit polyclonal, 11453-1-AP, Proteintech; WB 1:2000),  
370 anti-human cSRC (rabbit polyclonal, SRC2, Santa Cruz, sc-18; WB 1:1000), anti-  
371 human ILK (rabbit monoclonal, EP1593Y, Epitomics; WB 1:1000), anti-human  
372 p130Cas (rabbit polyclonal, N17, Santa Cruz; WB 1:1000), anti-human vinculin  
373 (mouse monoclonal, VIN-1, Sigma Aldrich, V9131; WB 1:1000), anti-human Hic-5  
374 (mouse monoclonal, 34, BD Biosciences, 611164; WB 1:500), anti-human paxillin  
375 (mouse monoclonal, 5H11, Thermo Fisher Scientific, AHO0492; WB 1:1000, IF 1:200),  
376 anti- GAPDH (mouse monoclonal, GA1R, Thermo Fisher Scientific, MA5-15738-  
377 HRP), anti-human Rac (rabbit polyclonal, invitrogen, PA5-17519; WB 1:1000), anti-  
378 human CEACAM1, 3, 4, 5, 6 (mouse monoclonal , D14HD11, Aldevron; WB 1:6000,  
379 IF 1:200); mouse monoclonal anti 6xHis (mouse monoclonal, HIS.H8, Thermo Fisher  
380 Scientific, MA1-21315; WB 1:2000), anti GFP (mouse monoclonal , JL8, Clontech;  
381 WB: 1:6000), anti-human tubulin (mouse monoclonal, E7, purified from hybridoma cell  
382 supernatants, Developmental Studies Hybridoma Bank, University of Iowa, USA; WB  
383 1:1000), anti-mouse integrin  $\beta$ 1 (Armenian hamster monoclonal, Hmb1-1, Thermo  
384 Fisher Scientific, 11-0291-82; FC 1:300), anti-mouse integrin  $\beta$ 3 (armenian hamster  
385 monoclonal, 2C9.G3, Thermo Fisher Scientific, 13-0611-81; FC 1:200), anti-mouse  
386 integrin  $\alpha$ 5 (rat monoclonal, MFR5, BD Biosciences, 553319; FC 1:300), anti-mouse

387 integrin  $\alpha$ V (rat monoclonal, RMV-7, BD Biosciences, 550024; FC 1:300) . Secondary  
388 antibodies used: horseradish peroxidase (HRP)-conjugated goat anti-mouse; WB:  
389 1:10.000, horseradish peroxidase (HRP)-conjugated goat anti-rabbit; WB: 1:5000;  
390 Cy5-conjugated goat anti-mouse; IF 1:200, Dylight 488 conjugated goat anti-mouse,  
391 IF 1:200, Rhodamine Red-X conjugated goat anti-arm. Hamster; FC 1:300,  
392 Rhodamine Red conjugated goat anti-rat; FC 1:300 (all from Jackson  
393 ImmunoResearch Inc., Baltimore, USA). CellMask Orange Plasma membrane stain,  
394 Thermo Fisher Scientific, C10045; IF 1:1000.

395

#### 396 Cell culture and transient transfection

397 Human embryonic kidney 293T cells (293T; American Type Culture Collection CRL-  
398 3216) were grown in DMEM supplemented with 10% calf serum. Flp-In™ 3T3 cells  
399 (Thermo Fisher Scientific) were cultured in DMEM supplemented with 10% fetal calf  
400 serum (FCS) and 1% non-essential amino acids. GFP-FAK expressing mouse  
401 embryonic fibroblasts (GFP-FAK MEFs) derived from FAK/p53  $-/-$  knockout MEFs  
402 (Schlaepfer et al., 2007) were cultured in DMEM supplemented with 10% FCS and 1%  
403 non-essential amino acids on gelatine-coated (0.1% in PBS) cell culture dishes. All  
404 cells were maintained at 37°C, 5% CO<sub>2</sub>, and subcultured every 2–3 days.

405 For transient transfection of 293T cells, cells were seeded at 25% confluence the day  
406 before and transfected using the standard calcium phosphate method with a total  
407 amount of 5  $\mu$ g plasmid DNA/dish. For transient transfection of Flp-In™ 3T3 cells, 1 x  
408 10<sup>5</sup> cells were seeded into 6 well plates the day before and transfected with using  
409 jetPRIME® transfection reagent (Polyplus transfection, Illkirch, France), following

410 manufacturer's protocol. GFP-FAK MEFs were transiently transfected with  
411 Lipofectamin 2000, according to manufacturer's recommendations.

412

413 Whole cell lysates (WCLs) and WB

414 WCLs were generated by lysing equal cell numbers in radioimmunoprecipitation assay  
415 buffer (1% Triton X-100, 50 mM Hepes, 150 mM NaCl, 10% glycerol, 1.5 mM MgCl<sub>2</sub>,  
416 1 mM EGTA, 0.1% wt/vol SDS, and 1% vol/vol deoxycholic acid) supplemented with  
417 freshly added protease and phosphatase inhibitors (10 mM sodium pyrophosphate,  
418 100 mM NaF, 1 mM sodium orthovanadate, 5 µg/ml leupeptin, 10 µg/ml aprotinin, 10  
419 µg/ml Pefabloc, 5 µg/ml pepstatin, and 10 µM benzamidine) and phosphatase  
420 saturating substrate (para-nitrophenolphosphate [pNPP]; Sigma-Aldrich; 10 mM).  
421 Chromosomal DNA was mechanically sheared by passing through a metal needle.  
422 DNA and cell debris were pelleted by addition of sepharose beads and centrifugation  
423 (13,000 rpm, 30 min, 4°C). Supernatant was supplemented with 4× SDS sample buffer  
424 (4% wt/vol SDS, 20% wt/vol glycerol, 125 mM Tris-HCl, 20% vol/vol β-  
425 mercaptoethanol, and 1% wt/vol Bromophenol blue, pH 6.8) and boiled for 5 min at  
426 95°C. Proteins were resolved on 10–18% SDS-PAGE. After separation, the proteins  
427 were transferred to a polyvinylidene fluoride membrane (Merck Millipore), followed by  
428 blocking in 2% BSA containing 50 mM Tris-HCl, 150 mM NaCl, and 0.05% Tween 20,  
429 pH 7.5 (TBS-T) buffer. The membrane was incubated with primary antibody in blocking  
430 buffer overnight at 4°C, washed three times with TBS-T, and incubated with HRP-  
431 conjugated secondary antibody in TBS-T for 1 h at RT. The chemiluminescent signal  
432 of each blot was detected with ECL substrate (Thermo Fisher Scientific) on the  
433 Chemidoc Touch Imaging System (Bio-Rad) in signal accumulation mode. Acquired

434 images were processed in Adobe Photoshop CS4 by adjusting illumination levels of  
435 the whole image.

436

#### 437 Recombinant DNA

438 The construction of His<sub>6</sub>SUMO-tagged talin F3, eGFP-tagged full length talin,  
439 His<sub>6</sub>SUMO-kindlin2 as well as the generation of the Twin-Strep-tag vector for bacterial  
440 expression has been described in detail (Grimm et al., 2020). The generation of CEA3-  
441 ITGBct fusion constructs has been described previously (Baade et al., 2019). cDNA  
442 of human paxillin isoform a (NM\_002859.4) was kindly provided by Alexander  
443 Bershady (Mechanobiology Institute, National University of Singapore, Singapore)  
444 and was used as template for PCR amplification. His<sub>6</sub>SUMO-PXN LIM2/3 was  
445 generated by amplifying paxillin using primers: PXN LIM2/3 forward: 5'-  
446 CCAGTGGGTCTCAGGTGGTTCCCCGCGCTGCTAC-3'; PXN LIM2/3 reverse: 5'-  
447 CTGATCCTCGAGTTACCCATTCTTGAAATATTCAGGCGAGCCGCGCCGCTC-3'.  
448 The product was then ligated into pET24a His-Sumo bacterial expression vector using  
449 Eco31I and XhoI restriction sites.

450 Paxillin full length was amplified using primers PXN-fl forward: 5'-  
451 ACTCCTCCCCGCCATGGACGACCTCGACGCCCTGCTG-3' and PXN-fl reverse:  
452 5'-  
453 CCCCACTAACCCGCTAGCAGAAGAGCTTGAGGAAGCAGTTCTGACAGTAAGG-  
454 3'. Paxillin LD1-5 was amplified using primers PXN-fl forward and PXN LD1-5 reverse:  
455 5'-CCCACTAACCCGCGAGCTTGTTTCAGGTCAG-3'. Paxillin LIM1-4 was amplified  
456 using primers PXN-LIM1-4 forward: 5'-

457 ACTCCTCCCCGCCATGAAGCTGGGGGTCGCCACAGTCGCCAAAG-3' and PXN-  
458 fl reverse.

459 cDNAs encoding LIM domain proteins: Hic-5 cDNA (isoform 1, NM\_001042454.3) was  
460 kindly provided by Nicole Brimer (University of Virginia, Charlottesville, USA). Hic-5  
461 was amplified using the primers Hic-5 forward: 5'-  
462 ACTCCCCGCCATGGAGGACCTGGATGCCC-3' and Hic-5 reverse: 5'-  
463 CCCCACTAACCCGTCAGCCGAAGAGCTTCAGG-3'. Leupaxin was amplified from  
464 pOTB7-LPXN (obtained from Harvard Medical School PlasmID Database;  
465 HsCD00331641) using primers LPXN forward: 5'-  
466 ACTCCTCCCCGCCATGGAAGAGTTAGATGCC-3' and LPXN reverse: 5'-  
467 CCCCACTAACCCGGCATTACAGTGGGAAGAGC-3'. PINCH-1 was amplified from  
468 pDNR-LIB hLIMS1 (obtained from Harvard Medical School PlasmID Database,  
469 HsCD00326503) using the primers PINCH forward: 5'-  
470 ACTCCTCCCCGCCATGGCCAACGCCCTGGCCAGC-3' and PINCH reverse: 5'-  
471 CCCCACTAACCCGTTTCCTTCTTAAGGTCTCAGC-3'. cDNA for LASP-1 was  
472 provided by Elke Butt (Universitätsklinikum Würzburg, Würzburg, Germany) and  
473 amplified using primers LASP forward: 5'-  
474 ACTCCTCCCCGCCATGAACCCCAACTGCGCC-3' and LASP reverse: 5'-  
475 CCCCACTAACCCGTCAGATGGCCTCCACGTAGTTGG-3'.

476 The respective PCR products were cloned into the pDNR-Dual-LIC vector according  
477 to the ligation independent cloning (LIC) strategy. The sequence verified constructs  
478 were then subcloned into the expression vector pEGFP-C1 harbouring a loxP  
479 recombination site via Cre-Lox recombination.

480 mEmerald-Migfilin was a gift from Michael Davidson (Addgene #54182) and was used  
481 unmodified. pEGFP-Zyxin was described elsewhere (Agerer et al., 2005).

482

### 483 Site directed mutagenesis

484 The amino-acid residue of interest was changed using the overlap-extension PCR  
485 mutagenesis procedure. Desalted oligonucleotide primers were purchased from  
486 Sigma-Aldrich (Merck KGaA, Darmstadt, Germany) and can be found in following  
487 table. Human Paxillin LIM2/3 was used as a template.

| 488 Mutation              | Forward primer                         | Reverse primer                       |
|---------------------------|----------------------------------------|--------------------------------------|
| 489 Paxillin LIM2/3 F475A | <code>gcaGTGAACGGCAGCTTCTTC</code>     | <code>TGGCGTGAAGCATTCCC</code>       |
| 490 Paxillin LIM2/3 V476A | <code>gcaAACGGCAGCTTCTTCGAGC</code>    | <code>GAATGGCGTGAAGCATTCC</code>     |
| 491 Paxillin LIM2/3 N477A | <code>gcaGGCAGCTTCTTCGAGCAC</code>     | <code>CACGAATGGCGTGAAGCATTCC</code>  |
| 492 Paxillin LIM2/3 G478A | <code>gcaAGCTTCTTCGAGCACGACG</code>    | <code>GTTACGAATGGCGTGAAGC</code>     |
| 493 Paxillin LIM2/3 S479A | <code>gcaTTCTTCGAGCACGACGG</code>      | <code>GCCGTTACGAATGGCGTG</code>      |
| 494 Paxillin LIM2/3 F480A | <code>gcaTTCGAGCACGACGGGCAG</code>     | <code>GCTGCCGTTACGAATGG</code>       |
| 495 Paxillin LIM2/3 F481A | <code>gcaGAGCACGACGGGCAGCCCTAC</code>  | <code>GAAGCTGCCGTTACGAATGGC</code>   |
| 496 Paxillin LIM2/3 4A    | <code>tgccagctTTCTTCGAGCACGACGG</code> | <code>gctgCGAATGGCGTGAAGCATTC</code> |

497

### 498 Recombinant protein expression

499 Recombinant proteins with His<sub>6</sub>-SUMO tag encoded on a pET24a vector were  
500 expressed in *E. coli* Tuner (DE3) cells. Cells were cultured in lysogeny broth medium  
501 containing 50 µg/mL kanamycin and 1% glucose (wt/vol) (for paxillin constructs

502 additionally 0.1 mM ZnCl<sub>2</sub>) at 37 °C until an OD<sub>600</sub> value of 0.6-0.8 was reached.  
503 Subsequently, overexpression was induced by addition of isopropyl β-D-  
504 thiogalactoside (IPTG) to a final concentration of 0.5 mM (for integrin β1 1 mM  
505 respectively). After 6-8 h incubation (for integrin-β1 overnight, respectively) at 30 °C  
506 cells were harvested by centrifugation at 10 000 x g for 15 min at 4 °C and stored at -  
507 80 °C. For isotopic labelling bacteria were cultured in M9-minimal medium containing  
508 <sup>15</sup>N ammonium chloride and/or <sup>13</sup>C glucose as sole nitrogen and carbon sources.  
509 Integrin cytoplasmic domains with a TwinStrepTagII tag encoded on a pET24a vector  
510 were expressed in *E. coli* BL21(DE3) pRosetta cells. Cells were cultured in lysogeny  
511 broth medium containing 50 µg/mL kanamycin. Expression conditions were identical  
512 to His<sub>6</sub>-SUMO integrin β cytoplasmic tails. His<sub>6</sub>-SUMO, His<sub>6</sub>-SUMO tagged talin F3  
513 and kindlin2 were expressed in *E. coli* BL21(DE3). Bacteria were grown at 37 °C to an  
514 OD of 0.6-0.8 and induced with 1 mM IPTG overnight at 30°C (His<sub>6</sub>-SUMO and talin  
515 F3) or 20 °C (kindlin2).

516

#### 517 Protein purification

518 All steps were performed at 4 °C. Pelleted cells were slowly thawed on ice,  
519 resuspended in 1:5 (wt/vol) lysis buffer (50 mM Tris, 300 mM NaCl, pH 8.0, protease  
520 inhibitors) and lysed via a high-pressure homogenizer (Emulsiflex C3, Avestin Inc.,  
521 Ottawa, Canada). The mixture was separated by ultracentrifugation at 100 000 x g for  
522 30 min at 4 °C and supernatant was loaded onto a HisTrap HP column (GE Healthcare,  
523 Freiburg, Germany) preequilibrated with 50 mM Tris, 10 mM imidazole and 300 mM  
524 NaCl, pH 8.0. The loaded column was washed and eluted fractions, monitored by UV  
525 absorbency at 280 nm, were pooled and dialyzed in 50 mM Tris, 300 mM NaCl, pH



526 8.0. After overnight cleavage with Ulp1 the His<sub>6</sub>-SUMO tag was removed by  
527 subsequent HisTrap purification and protein solution was subjected to size-exclusion  
528 by using HiLoad 16/60 Superdex 30 (for integrin constructs) or Superdex 75 column  
529 (for paxillin constructs, GE Healthcare, Freiburg, Germany) preequilibrated with 50  
530 mM Na<sub>2</sub>HPO<sub>4</sub>, 150 mM NaCl, pH 6.2 (for integrin constructs) or 7.5 (for paxillin  
531 constructs). For paxillin constructs all buffers contained also 0.1 mM ZnSO<sub>4</sub> and 1 mM  
532 DTT respectively. Purified protein was checked by SDS-PAGE.

533

534 Pulldown assays with integrin  $\beta$  cytoplasmic domains

535 2.5  $\mu$ g of TwinStrep-tagged integrins or 10  $\mu$ g of biotin-integrin peptides  $\beta$ 3wt aa742-  
536 788 (Biotin-HDRKEFAKFEEERARAKWDTANNPLYKEATSTFTNITYRGT-OH),  
537  $\beta$ 3 $\Delta$ 3aa aa742-785 (Biotin-HDRKEFAKFEEERARAKWDTANNPLYKEATSTFTNITY-  
538 OH)  $\beta$ 3 $\Delta$ 8aa aa742-780 (Biotin-HDRKEFAKFEEERARAKWDTANNPLYKEATSTFT-  
539 OH); all from Novopep Limited) were loaded onto Strep-Tactin Sepharose beads (50%  
540 suspension; IBA Lifesciences) or streptavidin agarose beads (50% suspension; 16-  
541 126; Merck) in pulldown buffer (50 mM Tris, pH 8, 150 mM NaCl, 10% glycerol, 0.05%  
542 Tween, 10  $\mu$ M ZnCl<sub>2</sub>) for 30 min at RT under continuous rotation. After centrifugation  
543 (2,700 g, 2 min, 4°C), samples were washed three times with pulldown buffer. Then  
544 integrin-loaded beads were suspended in bait protein solution (2  $\mu$ M of protein diluted  
545 in pulldown buffer) and incubated 2 h at 4°C under constant rotation. Samples were  
546 centrifuged (2,700 g, 2 min, 4°C) and washed three times with pulldown buffer. Strep-  
547 Tactin samples were eluted under native conditions by adding 30  $\mu$ l of buffer BXT (50  
548 mM Tris, pH 8, 150 mM NaCl, 50 mM biotin). After 10 min incubation at RT under  
549 constant rotation, samples were centrifuged. Supernatants were mixed with 4 $\times$  SDS

550 and boiled for 5 min at 95°C before they were subjected to WB. Streptavidin agarose  
551 beads were directly mixed with 2× SDS and boiled for 10 min at 95°C to elute proteins  
552 from biotin-integrin peptides before they were subjected to WB.

553

#### 554 Resonance assignment

555 All NMR-experiments for the resonance assignment and structure determination were  
556 recorded on a Bruker Avance III 600 MHz spectrometer equipped with an H/C/N TCI  
557 cryoprobe. Three-dimensional spectra were recorded using non-uniform sampling (25-  
558 50% sparse sampling) and reconstructed by recursive multidimensional  
559 decomposition (Topspin® v3.1-3.2). NMR-sample conditions: 500 μM <sup>13</sup>C-<sup>15</sup>N-Paxillin-  
560 LIM2/3, 150 mM NaCl, 50 mM Na<sub>2</sub>HPO<sub>4</sub>, 4 mM NaN<sub>3</sub>, 1 mM DTT, 5% (or 100% D<sub>2</sub>O),  
561 pH 7.5. Recorded 3D-spectra in 5% D<sub>2</sub>O: HNCO, HN(CA)CO, CBCANH,  
562 CBCA(CO)NH, H(CCCO)NH, (H)C(CCO)NH, NOESY-<sup>15</sup>N-HSQC, NOESY-<sup>13</sup>C<sub>ali.</sub>-  
563 HSQC; in 100% D<sub>2</sub>O: H(C)CH-TOCSY, (H)CCH-TOCSY, H(C)CH-COSY, NOESY-  
564 <sup>13</sup>C<sub>ali.</sub>-HSQC, NOESY-<sup>13</sup>C<sub>aro.</sub>-HSQC (NOESY mixing time: 120 ms in all spectra).  
565 Backbone resonance assignment was done semi-automatically using CARA v1.8.4.2  
566 and Autolink II v0.8.7 (Masse and Keller, 2005). The sidechain resonances were  
567 assigned manually. NOESY cross-peaks were picked and quantified using ATNOS  
568 (Herrmann et al., 2002)(implemented in UNIO'10 v2.0.2 (Serrano et al., 2012)).  
569 TALOS-N was used to calculate φ- und ψ- angles based on the backbone chemical  
570 shifts (Shen and Bax, 2013). The resonance assignment of paxillin LIM2/3 has been  
571 deposited to the BMRB (Entry 51154).

572

#### 573 Structure calculation

574 Initial Structure calculation was done using Cyana v3.0 (Guntert, 2004), with the  
575 protein sequence, the resonance assignment (CARA), NOESY-peaklists (ATNOS)  
576 and backbone angular restraints (TALOS-N) as input. In later stages of the calculation  
577 additional distance and angular constraints for a tetrahedral Zinc-coordination of the  
578 respective amino acids were implemented. The coordination mode of the four  
579 histidines (H403, H406, H462 and H492) was determined by the difference of chemical  
580 shifts of  $C^{\delta 2}$  and  $C^{\epsilon 1}$  and in all cases  $\delta(C^{\epsilon 1}) - \delta(C^{\delta 2})$  was larger than 17 ppm indicating  
581 a coordination via  $N^{\delta 1}$  for all histidines. The structures were visualized and analyzed  
582 with PyMOL v1.3 (The PyMOL Molecular Graphics System, Version 2.0 Schrödinger,  
583 LLC). The coordinates of the final ensemble have been deposited to the PDB  
584 (Accession code: 7QB0)

585 Table 1: Structural statistics

|     |                                              |               |
|-----|----------------------------------------------|---------------|
| 586 | <b>NMR constraints</b>                       |               |
| 587 | <i>Total unambiguous distance restraints</i> | 1226 (100.0%) |
| 588 | Intraresidue (i, i)                          | 303 (24.7%)   |
| 589 | Sequential (i, i+1)                          | 354 (28.9%)   |
| 590 | Medium-range ( $2 \leq  i-j  \leq 4$ )       | 151 (12.3%)   |
| 591 | Long-range ( $ i-j  > 4$ )                   | 418 (34.1%)   |
| 592 | <i>Total dihedral angle restraints</i>       | 343           |
| 593 | $\phi$                                       | 100           |
| 594 | $\psi$                                       | 100           |
| 595 | $\chi_1$                                     | 99            |
| 596 | $\chi_2$                                     | 31            |
| 597 | $\chi_3$                                     | 13            |
| 598 | <b>Ensemble statistics (20 structures)</b>   |               |
| 599 | <i>Violation analysis</i>                    |               |

|     |                                                |           |
|-----|------------------------------------------------|-----------|
| 600 | Maximum distance violation (Å)                 | 0.61      |
| 601 | Maximum dihedral angle violation region (deg.) | 12.19     |
| 602 |                                                |           |
| 603 | <i>Target function</i>                         |           |
| 604 | Mean CYANA target function                     | 5.75±0.5  |
| 605 |                                                |           |
| 606 | <i>rmsd from mean structure</i>                |           |
| 607 | Backbone heavy atoms (Å)                       | 0.77±0.17 |
| 608 | All heavy-atoms (Å)                            | 1.20±0.16 |
| 609 |                                                |           |
| 610 | <i>Ramachandran plot</i>                       |           |
| 611 | Most-favorable regions (%)                     | 77.4      |
| 612 | Additionally allowed regions (%)               | 21.3      |
| 613 | Generously allowed regions (%)                 | 1.0       |
| 614 | Disallowed regions (%)                         | 0.4       |

615

## 616 Chemical shift perturbation mapping

617 <sup>1</sup>H-<sup>15</sup>N HSQC spectra were recorded on a Bruker Avance III 600 MHz spectrometer  
618 equipped with a 5 mm BBI probe and a Bruker Avance NEO 500 MHz equipped with  
619 a H/C/N TCI CryoProbe Prodigy (Bruker Biospin GmbH, Rheinstetten, Germany).  
620 Chemical shifts were referenced to internal sodium 3-(Trimethylsilyl)propane-1-  
621 sulfonat-d6 (DSS) at 0.0 ppm. The spectra were processed and analyzed with  
622 Topspin® v2.1-4.0 (Bruker Biospin GmbH, Rheinstetten, Germany) and CARA (v.  
623 1.9.1.5.). For NMR-experiments the proteins were concentrated by repeated  
624 ultrafiltration (Amicon Ultra-4 Ultracel-3 kDa centrifugal filter device, Merck Millipore,  
625 Burlington, USA).

626 Experiments were performed at 298 K in buffer containing 50 mM Na<sub>2</sub>HPO<sub>4</sub>, 150 mM  
627 NaCl, 0.1 mM ZnSO<sub>4</sub>, 1 mM DTT, 5% D<sub>2</sub>O, pH = 6.2 (if integrin was <sup>15</sup>N-labeled) or  
628 7.5 (if paxillin was <sup>15</sup>N-labeled). Experimental procedure: To a sample of <sup>15</sup>N-labeled  
629 protein a stock solution of unlabeled interaction partner up to a final concentration of  
630 the respective constructs was added for collecting <sup>1</sup>H-<sup>15</sup>N HSQC spectra. The  
631 resonance assignment of integrin β1 was transferred from from BMRB entry 16159  
632 (Anthis et al., 2009) and for integrin β3 from the BMRB entry 15552 (Oxley et al.,  
633 2008). Chemical shift change (Δδ) was calculated with the equation

634 
$$\Delta\delta = \sqrt{0,5 * [\Delta\delta_H^2 + 0,14 * \Delta\delta_N^2]}$$

635 where Δδ [ppm] = δ<sub>bound</sub> - δ<sub>free</sub>. The titration curves were fitted in OriginPro® (v.  
636 b9.5.5.409) using equation:

637 
$$\Delta\delta([L], [P]) = \Delta\delta_{max} \frac{([P] + [L] + K_D) - \sqrt{([P] + [L] + K_D)^2 - 4[P][L]}}{2[P]}$$

638 A simultaneous fit for multiple signals was used, allowing individual Δδ<sub>max</sub> values for  
639 each residue, but a global value for the dissociation constant K<sub>D</sub>.

640

#### 641 sgRNA design and cloning

642 For the generation of recombinant sgRNA-expression vectors, we equipped the  
643 pBluescript vector (pBS SK+, Agilent technologies, Santa Clara, CA, USA) with the  
644 murine U6 promotor controlled sgRNA expression cassette from pSpCas9(BB)-2A-  
645 GFP (PX458, a gift from Feng Zhang, Addgene plasmid # 48138) (Ran et al., 2013).  
646 Therefore, we amplified the U6 controlled sgRNA expression cassette by polymerase  
647 chain reaction (PCR) with the following primer pair: U6\_sgRNA\_forward: 5'-

648 ATAGGTACCGTGAGGGCCTATTTCCC-3' U6\_sgRNA\_reverse: 5'-

649 ATACTCGAGGTCTGCAGAATTGGCGC-3'. The resulting construct was cloned into

650 pBS SK+ via XhoI and KpnI restriction sites. The sequence verified construct (pBS-

651 U6) was then digested with BbsI and ligated with the annealed primer pair:

652 MCS\_oligo\_forward:

653 5'-CACCGGGTCTTCGATGGGCCCAATTCGAATACACGTGGTTGATTTAAATGGG

654 CCCGAAGACCT-3'

655 MCS\_oligo\_reverse:

656 5'-AAACAGGTCTTCGGGCCCATTTAAATCAACCACGTGTATTCGAATTGG

657 GCCCATCGAAGACCC-3'

658 to create pBS-U6 with a multiple cloning site (pBS-U6-MCS) within the BbsI restriction

659 sites. To generate the respective pBS-U6-Cer-sgRNA plasmid, the following sgRNA

660 Oligos Cer-KO forward: 5'-CACCGCCGTCCAGCTCGACCAGGA-3' and Cer-KO

661 reverse: 5'-AACTCCTGGTCGAGCTGGACGGC-3' were annealed and ligated into

662 the pBS-U6-MCS vector via the BbsI restriction sites. To eliminate remaining pBS-U6-

663 MCS after the ligation step, samples were digested with BstBI. All constructs were

664 sequence verified by LGC Genomics.

665 For targeting paxillin the sgRNA oligos targeting exon 2 PXN-KO sense: 5'-

666 CACCGACGGTGGTGGTGGGACCGG-3' and PXN-KO reverse: 5'-

667 AAACCCGGTCCCACCACCGTC-3' were annealed and ligated into

668 pSpCas9(BB)-2A-GFP (PX458-sgRNA mPXN)). For targeting murine integrin  $\beta$ 3, the

669 sgRNA oligos targeting exon 2 mITGB3-KO sense: 5'-

670 CACCGCGGACAGGATGCGAGCGCAG-3' and mITGB3-KO reverse: 5'-

671 AAACCTGCGCTCGCATCCTGTCCGC-3' were annealed and ligated into pBS-U6-  
672 MCS to generate pBS-U6-mITGB3-sgRNA.

673 All sgRNAs were designed with the help of the CRISPR design tool  
674 (<http://crispr.mit.edu>) (Hsu et al., 2013) and E-CRISP ([www.e-crisp.org/E-CRISP](http://www.e-crisp.org/E-CRISP)).

675

676 Generation of integrin  $\beta$ 3 and paxillin knockout cell lines

677 For the generation of integrin  $\beta$ 3 and paxillin knockout cell lines, Flp-In 3T3 cell line  
678 (Invitrogen) was first stably transduced with a lentiviral vector encoding Histon2B  
679 mCerulean. Therefore, human histone 2B cDNA (H2B, gift from Thomas U. Meyer,  
680 University of Konstanz, Konstanz, Germany) was amplified by polymerase chain  
681 reaction (PCR) with the following primer pair: hH2B\_forward: 5'-  
682 ATAGCTAGCACCATGCCAGAGCCAGCGAAGTC-3' hH2B\_reverse: 5'-  
683 ATAACCGGTTTAGCGCTGGTGTACTTGG-3' and cloned into pmCerulean-C1 (gift  
684 from David Piston, Vanderbilt University Medical Center, Nashville, USA) via NheI and  
685 AgeI restriction sites. The resulting construct was again subjected to PCR amplification  
686 with primers: H2B-Cer\_forward: 5'-ATAGGATCCACCATGCCAGAGCCAGCGAAG-3'  
687 and H2B-Cer\_reverse: 5'-ATACTCGAGCTATTTGTACAGTTCGTCCATGCCG-3'.  
688 The PCR product was subcloned into pWZL Blastocidin (pWZLBlast, gift from Nicole  
689 Brimer, University of Virginia, Charlottesville, USA) via BamHI and XhoI restriction  
690 sites to generate pWZLBlast-H2B-Cer. For retroviral production, 80% confluent  
691 Phoenix-Eco cells (Swift et al., 2001) were transfected with pWZLBlast-H2B-Cer and  
692 cultured for 2 days. Afterwards, the supernatant was harvested, filtered through a 0.45  
693  $\mu$ m pore-size filter unit (Minisart®, Sartorius Stedim Biotech GmbH, Göttingen,  
694 Germany) and applied on previously seeded NIH3T3 Flp-In cells at a ratio of 1:1

695 (vol/vol, supernatant : NIH3T3 growth medium) together with 4 µg/ml Polybrene®  
696 (Sigma-Aldrich). Transduced cells were cultured in regular growth medium  
697 supplemented with 5 µg/ml blasticidin (Carl Roth GmbH + Co. KG, Karlsruhe,  
698 Germany). Cerulean-positive cells were sorted by FACS and seeded as single cells  
699 into 96-well plates to generate clonal Cerulean-positive NIH3T3 H2B-Cer Flp-In cell  
700 lines.

701 Paxillin knockout cells were generated by transiently transfecting NIH3T3 H2B-Cer  
702 Flp-In cells with a combination of PX458-sgRNA mPXN + pBS-U6-Cer-sgRNA at a  
703 ratio of 1:5. Integrin β3 knockout cells were generated by transiently transfecting  
704 NIH3T3 H2B-Cer Flp-In cells with a combination of PX458-sgRNA Cer + pBS-U6-  
705 mITGB3-sgRNA at a ratio of 1:5. 10 days after transfection, single cerulean negative  
706 cells were sorted into 96 well plates and clonal cell lines were expanded and knockout  
707 of the target protein was verified by Western Blot.

708

709 Stable complementation of knockout cells

710 For complementation of integrin β3, cDNA of murine integrin β3 (gift from Michael  
711 Davidson, addgene plasmid # 54130) was amplified by PCR using the following  
712 primers mITGB3 forward: 5'-GATGACACTAGTGACCGCCATGCGAGCGCAGTG-3'  
713 and mITGB3-fl reverse: 5'-  
714 TCGGCAGCCCTCGAGCTAAGTCCCCCGGTAGGTGATATTG-3'; mITGB3 forward  
715 and mITGB3Δ8aa reverse: 5'-  
716 TCGGCAGCCCTCGAGCTAGAAGGTGGAGGTGGCCTCTTTATAC-3'; mITGB3  
717 forward and mITGB3Δ3aa reverse: 5'-  
718 TCGGCAGCCCTCGAGCTAGTAGGTGATATTGGTGAAGGTGGAGGTG-3'.



719 The respective products were cloned into pEF5/FRT-DEST (gift from Rajat Rohatgi,  
720 Addgene plasmid # 41008) using SpeI and PspXI restriction sites.

721 For complementation of Flp-In paxillin KO cells, we equipped the expression vector  
722 pEF5/FRT-DEST with a GFP-tag adjacent to a LoxP site for C-terminal protein tagging  
723 via Cre-Lox recombination. Therefore, the respective sequence was amplified by PCR  
724 from pEGFP C1 (Clontech, Takara Bio Europe, Saint-Germain-en-Laye, France) with  
725 the following primer pair: EGFP\_forward: 5'-  
726 GCCTAGACTAGTTAGCGCTACCGGTCGCCACCATG-3' EGFP\_reverse: 5'-  
727 GCAGCGCTCGAGGGCTGATTATGATCAGTTATCTAGATCC-3'. The resulting  
728 construct was cloned into pEF5/FRT-DEST via SpeI and PspXI restriction sites to  
729 generate the expression vector pEF5/FRT EGFP C1 loxp.

730 The coding sequences (CDS) of paxillin was amplified by PCR with the following  
731 primers:

732 PXN-fl forward: 5'-ACTCCTCCCCCGCCATGGACGACCTCGACGCCCTGCTG-  
733 3'

734 PXN-fl reverse: 5'-  
735 CCCCACTAACCCGCTAGCAGAAGAGCTTGAGGAAGCAGTTCTGACAGTAAG

736 G-3'. PXN  $\Delta$ LIM4 forward: 5'-  
737 ACTCCTCCCCCGCCATGGACGACCTCGACGCCCTGCTG -3', PXN  $\Delta$ LIM4

738 reverse: 5'-CCCACTAACCCGCGAGCCGCGCCGCTCGTGGTAGTGC-3'; The  
739 paxillin 4A mutant was generated by overlap extension PCR. In a first PCR two

740 fragments were generated using primers PXN-fl forward and PXN-4A reverse: 5'-  
741 TGCTGCTGCAGCGAATGGCGTGAAGCATTCCCGGCACACAAAG -3'. For the

742 second fragment primers PXN-4A forward: 5'-

743 GCTGCAGCAGCATTCTTCGAGCACGACGGGCAGCCCTAC -3' and PXN-fl reverse  
744 were used. In a second step the two fragments were annealed by overlap extension  
745 PCR and amplified using primers PXN-fl forward and PXN-fl reverse.

746 The respective products were cloned into the pDNR-Dual-LIC vector according to the  
747 ligation independent cloning (LIC) strategy. The sequence verified constructs were  
748 then subcloned into the expression vector pEF5/FRT EGFP-C1 by Cre-Lox  
749 recombination.

750 Respective knockout cell lines were complemented by transient transfection of 0.8 µg  
751 cDNA coding for the gene of interest + 3.2 µg Flp recombinase expression vector  
752 (pOG44) using jetPRIME® transfection reagent (Polyplus transfection, Illkirch,  
753 France). After 3 days, positive cells were selected by addition of 250 µg/ml Hygromycin  
754 B for 8 days.

755

#### 756 Flow cytometry

757 Cells were trypsinized and suspended in growth medium. Samples were centrifuged  
758 at 100g for 3 min and the resulting pellet was re-suspended in FACS buffer (PBS with  
759 5% FCS, 2 mM EDTA). Cells were washed once in FACS buffer and 1x10<sup>6</sup> cells per  
760 sample were incubated with monoclonal anti-integrin antibodies as indicated for 1h at  
761 4°C under constant rotation. Cells were washed three times with FACS buffer, followed  
762 by incubation for 30 min with a Rhodamine-Red conjugated secondary antibody. Cells  
763 were analysed by flow cytometry (BD LSRFortessa, FACSDiva™ software, BD  
764 Biosciences, Heidelberg, Germany).

765

766 Cell spreading analysis

767 Sterile glass coverslips were coated over night at 4°C with 5µg/ml vitronectin or 5 µg/ml  
768 fibronectin type III repeats 9-11 (FNIII9-11). Cells were starved overnight in starvation  
769 medium (DMEM + 0.5% FCS). After 12h starvation cells were trypsinized, trypsin was  
770 inactivated using soybean trypsin inhibitor (Applichem; 0.25 mg/ml in DMEM + 0.25%  
771 BSA). Cells were pelleted by centrifugation (100g, 3 min, RT) and suspended in  
772 DMEM + 0.25% BSA. Cells were kept in suspension for 30 min before seeding on  
773 coated glass coverslips. After 30 and 120 min of adherence, cells were washed once  
774 with PBS++ (0.5 mM MgCl<sub>2</sub>, 0.9 mM CaCl<sub>2</sub>), fixed with 4% PFA in PBS for 15 min at  
775 RT, washed thrice in PBS, permeabilized with 0.4% Triton-X-100 in PBS for 5 min at  
776 RT, washed thrice in PBS and blocked for 30 min in blocking buffer (10% heat  
777 inactivated CS in PBS). Cells were stained with CellMask™ Orange (diluted to 5µg/ml  
778 in blocking buffer) and DAPI (diluted to 0.2 µg/ml in blocking buffer) for 30 min at RT.  
779 Images were analysed by a custom build ImageJ macro (Bioimaging Center,  
780 University of Konstanz)

781

782 Fluorescent Microscopy and microscope settings

783 For confocal laser scanning microscopy all images were taken from fixed specimens  
784 embedded in Dako fluorescent mounting medium (Dako Inc, Carpinteria, USA) on a  
785 LEICA SP5 confocal microscope equipped with a 63.0x/1.40 NA oil HCX PL APO CS  
786 UV objective and analyzed using LAS AF Lite software. All images were acquired in  
787 xyz mode with 1024 x 1024 pixel format and 100 Hz scanning speed at 8 bit resolution.  
788 Fluorochromes used are Pacific Blue (excitation 405 nm, emission bandwidth: 435 –  
789 475 nm); CF405M (excitation 405 nm, emission bandwidth: 435 – 475) GFP (excitation

790 488 nm, emission bandwidth: 500 – 525 nm); CellMask Orange (excitation 561 nm,  
791 emission bandwidth: 571 – 613 nm), RFP (excitation 561 nm. Emission bandwidth 571  
792 – 613 nm) and Cy5 (excitation 633 nm, emission bandwidth: 640 -700 nm). Images  
793 were processed using ImageJ by applying the same brightness/contrast adjustments  
794 to all images within one experimental group.

795

## 796 TIRF microscopy

797 Cells were starved overnight in starvation medium (DMEM + 0.5% FCS). After 12h  
798 starvation cells were trypsinized, trypsin was inactivated using soybean trypsin  
799 inhibitor (Applichem; 0.25 mg/ml in DMEM + 0.25% BSA). Cells were pelleted by  
800 centrifugation (100g, 3 min, RT) and suspended in DMEM + 0.25% BSA. Cells were  
801 kept in suspension for 30 min before seeding on Wilco dishes, coated with 5 µg/ml  
802 vitronectin. Cells were imaged with a GE DeltaVision OMX BlazeV4, equipped with a  
803 60x/1.49 UIS2 APON TIRFM objective in Ring TIRF mode. Settings were adjusted to  
804 reach clean TIRF illumination without epifluorescence. A separate sCMOS camera  
805 was used for each channel and images were later aligned using OMX image alignment  
806 calibration and softWoRx 7.0. Fluorophores used were GFP (excitation wavelength  
807 488 nm, emission bandwidth: 528/48 nm) and Cy5 (excitation wavelength 647 nm,  
808 emission bandwidth: 683/40 nm).

809

## 810 Opa-protein triggered integrin clustering (OPTIC)

811 OPTIC was performed as described previously (Baade et al., 2019). Briefly, 293T cells  
812 were transfected with pcDNA3.1 CEACAM3-ITGB fusion constructs together with  
813 cDNA coding for the protein of interest fused to eGFP. 48 h post-transfection, cells

814 were seeded on coverslips coated with 10 µg/ml poly-L-lysine in suspension medium  
815 (DMEM + 0.25% BSA). After 2h, adherent cells were infected with Pacific Blue-stained  
816 *Neisseria gonorrhoeae* (Opa52-expressing, non-piliated *N. gonorrhoeae* MS11-B2.1,  
817 kindly provided by T. Meyer, Berlin, Germany) at MOI 20 for 1h in suspension medium.  
818 After 1h cells were fixed for 15 min with 4% paraformaldehyde in PBS at room  
819 temperature followed by 5 min permeabilization with 0.1% Triton X-100 in PBS. After  
820 washing with PBS, cells were incubated for 10 min in blocking solution (10% heat  
821 inactivated calf serum in PBS) and stained for CEACAM3. After washing, cells were  
822 again incubated for 10 min in blocking solution followed by secondary antibody  
823 staining. Coverslips were mounted on glass slides using Dako fluorescent mounting  
824 medium (Dako Inc, Carpinteria, USA).

825

## 826 **Acknowledgments**

827 This work was funded by Deutsche Forschungsgemeinschaft via CRC969, project B06  
828 (to CRH) and via RTG 2473 “Bioactive Peptides”, project C3 (to HMM). We gratefully  
829 acknowledge initial contributions to peptide and protein preparation and interaction  
830 studies by J. Ude, M. Roth, M. Gallandi, and S. Feindler-Boeckh, as well as expert  
831 support in mass spectrometry by Dr. I. Starke. We thank D. Schlaepfer (UCSD, San  
832 Diego, CA) for providing GFP-FAK re-expressing FAK<sup>-/-</sup> murine fibroblasts and R.  
833 Fässler and R. Böttcher (MPI for Biochemistry, Martinsried, Germany) for providing  
834 kindlin1/kindlin2 deficient mouse fibroblasts. We would also like to thank the Core  
835 Facilities of the University of Konstanz for excellent help and support with cell sorting  
836 (A. Sommershof, FlowKon) and microscopy (M. Stöckl, Bioimaging Center).

837

## 838 **Author contributions**

839 H.M.M. and C.R.H. conceived the study. H.M.M., C.R.H., T.B., M.M., A.P., C.P. and  
840 N.K. designed the experiments. T.B., C.P. and L.S. cloned constructs, established cell  
841 lines and performed OPTIC assays. T.B. performed cell-spreading experiments, TIRF  
842 microscopy and pulldown assays. M.M., A.P., N.K. and R.N. cloned and prepared  
843 paxillin and integrin proteins and peptides and performed NMR experiments. All  
844 authors analyzed and interpreted data. T.B., M.M., H.M.M. and C.R.H wrote the  
845 manuscript.

846

## 847 **Conflict of Interest**

848 The authors declare that they have no conflict of interest.

849 **References**

850

- 851 Agerer, F., Lux, S., Michel, A., Rohde, M., Ohlsen, K., and Hauck, C.R. (2005).  
852 Cellular invasion by *Staphylococcus aureus* reveals a functional link between  
853 focal adhesion kinase and cortactin in integrin-mediated internalisation. *J Cell*  
854 *Sci* **118**, 2189-2200.
- 855 Anderson, C. A., Kovar, D. R., Gardel, M. L., & Winkelman, J. D. (2021). LIM domain  
856 proteins in cell mechanobiology. *Cytoskeleton*, **78**( 6), 303– 311.  
857 <https://doi.org/10.1002/cm.21677>.
- 858 Anthis, N.J., Wegener, K.L., Ye, F., Kim, C., Goult, B.T., Lowe, E.D., Vakonakis, I.,  
859 Bate, N., Critchley, D.R., Ginsberg, M.H., *et al.* (2009). The structure of an  
860 integrin/talin complex reveals the basis of inside-out signal transduction. *EMBO J*  
861 **28**, 3623-3632.
- 862 Atherton, P., Lausecker, F., Carisey, A., Gilmore, A., Critchley, D., Barsukov, I., and  
863 Ballestrem, C. (2020). Relief of talin autoinhibition triggers a force-independent  
864 association with vinculin. *J Cell Biol* **219**, e201903134. doi:  
865 [10.1083/jcb.201903134](https://doi.org/10.1083/jcb.201903134).
- 866 Baade, T., Paone, C., Baldrich, A., and Hauck, C.R. (2019). Clustering of integrin  $\beta$   
867 cytoplasmic domains triggers nascent adhesion formation and reveals a  
868 protozoan origin of the integrin-talin interaction. *Scientific reports* **9**, 5728. doi:  
869 [10.1038/s41598-019-42002-6](https://doi.org/10.1038/s41598-019-42002-6).
- 870 Bachmann, M., Kukkurainen, S., Hytonen, V.P., and Wehrle-Haller, B. (2019). Cell  
871 Adhesion by Integrins. *Physiol Rev* **99**, 1655-1699.
- 872 Bharadwaj, M., Strohmeyer, N., Colo, G.P., Helenius, J., Beerenwinkel, N., Schiller,  
873 H.B., Fassler, R., and Muller, D.J. (2017).  $\alpha$ V-class integrins exert dual roles  
874 on  $\alpha$ 5 $\beta$ 1 integrins to strengthen adhesion to fibronectin. *Nat Commun* **8**,  
875 14348.
- 876 Bottcher, R.T., Veelders, M., Rombaut, P., Faix, J., Theodosiou, M., Stradal, T.E.,  
877 Rottner, K., Zent, R., Herzog, F., and Fassler, R. (2017). Kindlin-2 recruits  
878 paxillin and Arp2/3 to promote membrane protrusions during initial cell  
879 spreading. *J Cell Biol* **216**, 3785-3798.
- 880 Brown, M.C., Perrotta, J.A., and Turner, C.E. (1996). Identification of LIM3 as the  
881 principal determinant of paxillin focal adhesion localization and characterization  
882 of a novel motif on paxillin directing vinculin and focal adhesion kinase binding. *J*  
883 *Cell Biol* **135**, 1109-1123.
- 884 Chastney, M.R., Lawless, C., Humphries, J.D., Warwood, S., Jones, M.C., Knight,  
885 D., Jorgensen, C., and Humphries, M.J. (2020). Topological features of integrin  
886 adhesion complexes revealed by multiplexed proximity biotinylation. *J Cell Biol*  
887 **219**.
- 888 Deakin, N.O., Pignatelli, J., and Turner, C.E. (2012). Diverse roles for the paxillin  
889 family of proteins in cancer. *Genes & cancer* **3**, 362-370.

- 890 Deakin, N.O., and Turner, C.E. (2008). Paxillin comes of age. *J Cell Sci* *121*, 2435-  
891 2444.
- 892 Digman, M.A., Brown, C.M., Horwitz, A.R., Mantulin, W.W., and Gratton, E. (2008).  
893 Paxillin dynamics measured during adhesion assembly and disassembly by  
894 correlation spectroscopy. *Biophys J* *94*, 2819-2831.
- 895 Gao, J., Huang, M., Lai, J., Mao, K., Sun, P., Cao, Z., Hu, Y., Zhang, Y., Schulte,  
896 M.L., Jin, C., *et al.* (2017). Kindlin supports platelet integrin  $\alpha$ IIb $\beta$ 3  
897 activation by interacting with paxillin. *J Cell Sci* *130*, 3764-3775.
- 898 Geiger, B., and Yamada, K.M. (2011). Molecular architecture and function of matrix  
899 adhesions. *Cold Spring Harb Perspect Biol.* *3*, a005033. doi:  
900 10.1101/cshperspect.a005033.
- 901 Grimm, T.M., Dierdorf, N.I., Betz, K., Paone, C., and Hauck, C.R. (2020). PPM1F  
902 controls integrin activity via a conserved phospho-switch. *J Cell Biol* *219*,  
903 e202001057. doi: 10.1083/jcb.202001057
- 904 Guntert, P. (2004). Automated NMR structure calculation with CYANA. *Methods Mol*  
905 *Biol* *278*, 353-378.
- 906 Herrmann, T., Guntert, P., and Wuthrich, K. (2002). Protein NMR structure  
907 determination with automated NOE-identification in the NOESY spectra using  
908 the new software ATNOS. *J Biomol NMR* *24*, 171-189.
- 909 Horton, E.R., Byron, A., Askari, J.A., Ng, D.H., Millon-Fremillon, A., Robertson, J.,  
910 Koper, E.J., Paul, N.R., Warwood, S., Knight, D., *et al.* (2015). Definition of a  
911 consensus integrin adhesome and its dynamics during adhesion complex  
912 assembly and disassembly. *Nat Cell Biol.* *17*, 1577-1587. doi: 10.1038/ncb3257.
- 913 Hsu, P.D., Scott, D.A., Weinstein, J.A., Ran, F.A., Konermann, S., Agarwala, V., Li,  
914 Y., Fine, E.J., Wu, X., Shalem, O., *et al.* (2013). DNA targeting specificity of  
915 RNA-guided Cas9 nucleases. *Nat Biotechnol* *31*, 827-832.
- 916 Hynes, R.O. (2002). Integrins: bidirectional, allosteric signaling machines. *Cell* *110*,  
917 673-687.
- 918 Kadrmas, J.L., and Beckerle, M.C. (2004). The LIM domain: from the cytoskeleton to  
919 the nucleus. *Nat Rev Mol Cell Biol* *5*, 920-931.
- 920 Kanchanawong, P., Shtengel, G., Pasapera, A.M., Ramko, E.B., Davidson, M.W.,  
921 Hess, H.F., and Waterman, C.M. (2010). Nanoscale architecture of integrin-  
922 based cell adhesions. *Nature* *468*, 580-584.
- 923 Klapproth, S., Bromberger, T., Turk, C., Kruger, M., and Moser, M. (2019). A kindlin-  
924 3-leupaxin-paxillin signaling pathway regulates podosome stability. *J Cell Biol*  
925 *218*, 3436-3454.
- 926 Kong, F., Garcia, A.J., Mould, A.P., Humphries, M.J., and Zhu, C. (2009).  
927 Demonstration of catch bonds between an integrin and its ligand. *J Cell Biol* *185*,  
928 1275-1284.
- 929 Kontaxis, G., Konrat, R., Krautler, B., Weiskirchen, R., and Bister, K. (1998).  
930 Structure and intramodular dynamics of the amino-terminal LIM domain from  
931 quail cysteine- and glycine-rich protein CRP2. *Biochemistry* *37*, 7127-7134.



- 932 Lawson, C., Lim, S.T., Uryu, S., Chen, X.L., Calderwood, D.A., and Schlaepfer, D.D.  
933 (2012). FAK promotes recruitment of talin to nascent adhesions to control cell  
934 motility. *J Cell Biol* 196, 223-232.
- 935 Lawson, C., and Schlaepfer, D.D. (2012). Integrin adhesions: who's on first? What's  
936 on second? Connections between FAK and talin. *Cell adhesion & migration* 6,  
937 302-306.
- 938 Masse, J.E., and Keller, R. (2005). AutoLink: automated sequential resonance  
939 assignment of biopolymers from NMR data by relative-hypothesis-prioritization-  
940 based simulated logic. *J Magn Reson* 174, 133-151.
- 941 Matthews, J.M., Bhati, M., Lehtomaki, E., Mansfield, R.E., Cubeddu, L., and Mackay,  
942 J.P. (2009). It takes two to tango: the structure and function of LIM, RING, PHD  
943 and MYND domains. *Curr Pharm Des* 15, 3681-3696.
- 944 Missirlis, D., Haraszti, T., Scheele, C., Wiegand, T., Diaz, C., Neubauer, S.,  
945 Rechenmacher, F., Kessler, H., and Spatz, J.P. (2016). Substrate engagement  
946 of integrins alpha5beta1 and alphavbeta3 is necessary, but not sufficient, for  
947 high directional persistence in migration on fibronectin. *Sci Rep* 6, 23258.
- 948 Moser, M., Legate, K.R., Zent, R., and Fassler, R. (2009). The tail of integrins, talin,  
949 and kindlins. *Science* 324, 895-899.
- 950 Oxley, C.L., Anthis, N.J., Lowe, E.D., Vakonakis, I., Campbell, I.D., and Wegener, L.  
951 (2008). An Integrin Phosphorylation Switch: The effect of {beta}3 integrin tail  
952 phosphorylation on DOK1 and talin binding. *J Biol Chem* 283, 5420-5426.
- 953 Pasapera, A.M., Schneider, I.C., Rericha, E., Schlaepfer, D.D., and Waterman, C.M.  
954 (2010). Myosin II activity regulates vinculin recruitment to focal adhesions  
955 through FAK-mediated paxillin phosphorylation. *J Cell Biol* 188, 877-890.
- 956 Perez-Alvarado, G.C., Miles, C., Michelsen, J.W., Louis, H.A., Winge, D.R.,  
957 Beckerle, M.C., and Summers, M.F. (1994). Structure of the carboxy-terminal  
958 LIM domain from the cysteine rich protein CRP. *Nat Struct Biol* 1, 388-398.
- 959 Pinon, P., Parssinen, J., Vazquez, P., Bachmann, M., Rahikainen, R., Jacquier,  
960 M.C., Azizi, L., Maatta, J.A., Bastmeyer, M., Hytonen, V.P., *et al.* (2014). Talin-  
961 bound NPLY motif recruits integrin-signaling adapters to regulate cell spreading  
962 and mechanosensing. *J Cell Biol* 205, 265-281.
- 963 Ran, F.A., Hsu, P.D., Wright, J., Agarwala, V., Scott, D.A., and Zhang, F. (2013).  
964 Genome engineering using the CRISPR-Cas9 system. *Nat Protocols* 8, 2281-  
965 2308.
- 966 Ripamonti, M., Liaudet, N., Azizi, L., Bouvard, D., Hytonen, V.P., and Wehrle-Haller,  
967 B. (2021). Structural and functional analysis of LIM domain-dependent  
968 recruitment of paxillin to alphavbeta3 integrin-positive focal adhesions. *Commun*  
969 *Biol* 4, 380.
- 970 Roca-Cusachs, P., Gauthier, N.C., Del Rio, A., and Sheetz, M.P. (2009). Clustering  
971 of alpha(5)beta(1) integrins determines adhesion strength whereas  
972 alpha(v)beta(3) and talin enable mechanotransduction. *Proc Natl Acad Sci U S A*  
973 106, 16245-16250.

- 974 Sattler, M., Schleucher, J., and Griesinger, C. (1999). Heteronuclear  
975 multidimensional NMR experiments for the structure determination of proteins in  
976 solution employing pulsed field gradients. *Prog Nucl Mag Res Sp* **34**, 93-158.
- 977 Schiller, H.B., Friedel, C.C., Boulegue, C., and Fassler, R. (2011). Quantitative  
978 proteomics of the integrin adhesome show a myosin II-dependent recruitment of  
979 LIM domain proteins. *EMBO Rep* **12**, 259-266.
- 980 Schiller, H.B., Hermann, M.R., Polleux, J., Vignaud, T., Zanivan, S., Friedel, C.C.,  
981 Sun, Z., Raducanu, A., Gottschalk, K.E., Thery, M., *et al.* (2013). beta1- and  
982 alphav-class integrins cooperate to regulate myosin II during rigidity sensing of  
983 fibronectin-based microenvironments. *Nat Cell Biol* **15**, 625-636.
- 984 Schlaepfer, D.D., Hou, S., Lim, S.T., Tomar, A., Yu, H., Lim, Y., Hanson, D.A., Uryu,  
985 S.A., Molina, J., and Mitra, S.K. (2007). Tumor necrosis factor-alpha stimulates  
986 FAK activity required for mitogen-activated kinase-associated interleukin 6  
987 expression. *J Biol Chem.* **282**, 17450-9. doi: 10.1074/jbc.M610672200.
- 988 Serrano, P., Pedrini, B., Mohanty, B., Geralt, M., Herrmann, T., and Wuthrich, K.  
989 (2012). The J-UNIO protocol for automated protein structure determination by  
990 NMR in solution. *J Biomol NMR* **53**, 341-354.
- 991 Shen, Y., and Bax, A. (2013). Protein backbone and sidechain torsion angles  
992 predicted from NMR chemical shifts using artificial neural networks. *J Biomol*  
993 *NMR* **56**, 227-241.
- 994 Sun, Z., Costell, M., and Fassler, R. (2019). Integrin activation by talin, kindlin and  
995 mechanical forces. *Nat Cell Biol* **21**, 25-31.
- 996 Sun, Z., Guo, S.S., and Fassler, R. (2016). Integrin-mediated mechanotransduction.  
997 *J Cell Biol* **215**, 445-456.
- 998 Swift, S., Lorens, J., Achacoso, P. and Nolan, G.P. (1999), Rapid Production of  
999 Retroviruses for Efficient Gene Delivery to Mammalian Cells Using 293T Cell-  
1000 Based Systems. *Current Protocols in Immunology*, **31**: 10.17.14-10.17.29.  
1001 <https://doi.org/10.1002/0471142735.im1017cs31>
- 1002 Theodosiou, M., Widmaier, M., Bottcher, R.T., Rognoni, E., Veelders, M., Bharadwaj,  
1003 M., Lambacher, A., Austen, K., Muller, D.J., Zent, R., *et al.* (2016). Kindlin-2  
1004 cooperates with talin to activate integrins and induces cell spreading by directly  
1005 binding paxillin. *eLife* **5**, e10130. doi: 10.7554/eLife.10130.
- 1006 Wang, P., Ballestrem, C., and Streuli, C.H. (2011). The C terminus of talin links  
1007 integrins to cell cycle progression. *J Cell Biol* **195**, 499-513.
- 1008 Zacharchenko, T., Qian, X., Goult, B.T., Jethwa, D., Almeida, T.B., Ballestrem, C.,  
1009 Critchley, D.R., Lowy, D.R., and Barsukov, I.L. (2016). LD Motif Recognition by  
1010 Talin: Structure of the Talin-DLC1 Complex. *Structure* **24**, 1130-1141.
- 1011 Zaidel-Bar, R., Itzkovitz, S., Ma'ayan, A., Iyengar, R., and Geiger, B. (2007).  
1012 Functional atlas of the integrin adhesome. *Nat Cell Biol* **9**, 858-867.
- 1013 Zhang, X., Jiang, G., Cai, Y., Monkley, S.J., Critchley, D.R., and Sheetz, M.P.  
1014 (2008). Talin depletion reveals independence of initial cell spreading from  
1015 integrin activation and traction. *Nat Cell Biol* **10**, 1062-1068.

1016 Zhu, L., Liu, H., Lu, F., Yang, J., Byzova, T.V., and Qin, J. (2019). Structural Basis of  
1017 Paxillin Recruitment by Kindlin-2 in Regulating Cell Adhesion. *Structure* 27,  
1018 1686-1697 e1685.

1019

1020

1021

1022 **Figure legends**

1023 **Figure 1: Paxillin LIM2/3 domains can directly bind the cytoplasmic tails of**  
1024 **integrin  $\beta$ 1 and  $\beta$ 3**

1025 (A) Stable GFP-Paxillin expressing Flp-In 3T3 cells were transiently transfected with  
1026 RFP-tagged LIM1-4 or LD1-5 domains. (B) Paxillin localization at FAs was evaluated  
1027 by measuring the GFP fluorescence intensity in presence of either overexpressed LIM  
1028 or LD domains. Shown are mean values of GFP-intensity from three independent  
1029 experiments. The total number of analysed FAs is given in brackets under each  
1030 sample. Error bars represent 5 and 95 percentiles. Significance was calculated using  
1031 one-way ANOVA, followed by Bonferroni Multiple Comparison Test (\*\* $p < 0.0001$ , ns  
1032 = not significant). (C) In vitro pulldown using recombinant Twin-Strep-tag integrin  $\beta$   
1033 cytoplasmic tails and recombinant talin1 F3 domain, full length kindlin2 as well as  
1034 paxillin LIM2/3 domain fused to His<sub>6</sub>-Sumo, or His<sub>6</sub>-Sumo only as negative control. (D)  
1035 and (E) Solution structure of paxillin LIM2/3. The final ensemble of ten conformers with  
1036 lowest target function is shown fitted to the LIM2 domain (residues P381 to F438) (D)  
1037 and fitted to the LIM3-domain (residues P440 to R497) (E), shown in ribbon  
1038 representations. In the fitted part,  $\alpha$ -helices are colored cyan and  $\beta$ -strands magenta.  
1039 Zinc ions are shown as grey spheres. The flexible loop of the LIM3 domain (residue  
1040 T473 to E482) is shown in blue. The domain that was not used for fitting is shown in  
1041 light grey.

1042

1043 **Figure 2: The C-terminal residues of integrin  $\beta$ 3 cytoplasmic tail are crucial for**  
1044 **paxillin binding**

1045 (A)  $^{15}\text{N}$ -HSQC titration of 300  $\mu\text{M}$   $^{15}\text{N}$  integrin  $\beta 3$  ct (ITGB3 ct) with paxillin LIM2/3.  
1046 Paxillin was added in concentrations up to 900  $\mu\text{M}$ . Boxes show a selection of signals  
1047 affected by CSPs (residues N782, I783 & R786) in the presence of 0  $\mu\text{M}$  (black), 150  
1048  $\mu\text{M}$  (green), 300  $\mu\text{M}$  (blue) and 900  $\mu\text{M}$  (red) paxillin LIM2/3. Insets show the  
1049 concentration dependence of combined amide CSPs globally fitted to a one site  
1050 binding model. (B) Combined amide CSPs of 300  $\mu\text{M}$   $^{15}\text{N}$  integrin  $\beta 3$  ct in the presence  
1051 of 760  $\mu\text{M}$  paxillin LIM2/3 vs residue number of integrin  $\beta 3$  ct. Lines indicate average  
1052  $\delta\Delta + 1x$  s.d. (yellow),  $\delta\Delta + 2x$  s.d. (orange) and  $\delta\Delta + 3x$  s.d. (red). (C) Representative  
1053 Western Blot of in vitro pulldown using biotinylated integrin  $\beta$  peptides and  
1054 recombinant His<sub>6</sub>-SUMO or His<sub>6</sub>-SUMO-paxillin LIM2/3 (PXN LIM2/3). A decreased  
1055 binding of paxillin to truncated integrin  $\beta 3$  peptides is visible. Lower panel:  
1056 Densitometric quantification of the Western Blots in (A) (n=3). Statistical significance  
1057 was calculated using One sample t-test to calculate if samples mean are significantly  
1058 different from a hypothetical value of 1 (\* p<0.05, \*\* p< 0.01). (D)  $^{15}\text{N}$ -HSQC titration  
1059 of 300  $\mu\text{M}$   $^{15}\text{N}$  integrin  $\beta 3$   $\Delta 3aa$  (ITGB3  $\Delta 3aa$ ) with paxillin LIM2/3 (PXN LIM2/3).  
1060 Paxillin was added up to a concentration of 750  $\mu\text{M}$ . (E) Combined amide CSPs of 300  
1061  $\mu\text{M}$   $^{15}\text{N}$  integrin  $\beta 3$  ct  $\Delta 3aa$  in the presence of 750  $\mu\text{M}$  paxillin LIM2/3 vs residue  
1062 number of integrin  $\beta 3$  ct  $\Delta 3aa$ .

1063

1064 **Figure 3: C-terminally truncated integrin  $\beta 3$  causes defective cell spreading.**

1065 (A) and (B) Serum starved Flp-In 3T3 integrin  $\beta 3$  knockout fibroblasts or knockout cells  
1066 re-expressing integrin  $\beta 3$  wt or C-terminally truncated integrin  $\beta 3$  mutants were seeded  
1067 onto glass slides coated with 5  $\mu\text{g}/\text{ml}$  fibronectin (A) or 5  $\mu\text{g}/\text{ml}$  vitronectin (B) for 30  
1068 min and cell area was measured. Shown are mean values and 95% confidence

1069 intervals of n=60 cells per sample from 3 independent experiments. Statistical  
1070 significance was calculated using one-way ANOVA followed by Bonferroni Multiple  
1071 Comparison Test. (C) Serum starved kindlin1/2 deficient fibroblasts (Kind<sup>KO</sup>) cells  
1072 stably expressing full length integrin  $\beta$ 3 or truncated mutants were seeded on glass  
1073 coverslips coated with 50  $\mu$ g/ml vitronectin (left panel) or poly-Lysin (right panel) for 4  
1074 h. Cells were fixed and stained for endogenous paxillin. (D) Serum starved Kind<sup>KO</sup>  
1075 cells stably expressing full length integrin  $\beta$ 3 or truncated mutants were seeded on  
1076 glass coverslips coated with 50  $\mu$ g/ml vitronectin for 4 h. Cells were fixed and stained  
1077 for endogenous talin.

1078

1079 **Figure 4: The LIM3 flexible loop mediates binding to the integrin  $\beta$  cytoplasmic**  
1080 **tail**

1081 (A) Mapping of combined amide CSPs when binding to integrin  $\beta$ 3 onto the solution  
1082 structure of paxillin LIM2/3 shown as surface representation from two perspectives.  
1083 Residues showing CSPs larger than average  $\delta\Delta + 3x$  s.d. are colored red, residues  
1084 for which [average  $\delta\Delta + 3x$  s.d. <  $\delta\Delta$  < average  $\delta\Delta + 2x$  s.d.] are colored orange, and  
1085 residues for which [average  $\delta\Delta + 2x$  s.d. <  $\delta\Delta$  < average  $\delta\Delta + 1x$  s.d.] are colored  
1086 yellow. Residues with  $\delta\Delta$  < average + 1x s.d. are colored grey. The boxed region is  
1087 also shown in stick representation including the flexible loop of the LIM3 domain using  
1088 the same color code. Residues experiencing significant CSPs are labelled by amino  
1089 acid type and position. (B) Combined amide CSPs of 250  $\mu$ M <sup>15</sup>N paxillin LIM2/3 in the  
1090 presence of 750  $\mu$ M integrin  $\beta$ 3 vs residue number of paxillin. Lines indicate average  
1091  $\delta\Delta + 1x$  s.d. (yellow),  $\delta\Delta + 2x$  s.d. (orange) and  $\delta\Delta + 3x$  s.d. (red). (C) <sup>15</sup>N-HSQC  
1092 titration of 250  $\mu$ M <sup>15</sup>N paxillin LIM2/3 wt (PXN LIM2/3 wt) with integrin  $\beta$ 3. Integrin was

1093 added in concentrations up to 2420  $\mu$ M. Boxes show a selection of signals affected by  
1094 CSPs (residues F480 & F481) in the presence of 0  $\mu$ M (black), 200  $\mu$ M (green), 600  
1095  $\mu$ M (blue) and 2420  $\mu$ M (red) integrin  $\beta$ 3 ct. (D) Recombinantly expressed His<sub>6</sub>-SUMO  
1096 PXN LIM2/3 wt or His<sub>6</sub>-SUMO PXN LIM2/3 4A were pulled down using Twin-Strep-  
1097 Tag integrin  $\beta$ 3 ct. PXN LIM2/3 4A shows reduced binding to integrin  $\beta$ 3 ct. (E)  
1098 Outside-in signalling dependent cell spreading of paxillin knockout cells, stably re-  
1099 expressing ctrl vector (PXN KO), GFP-paxillin wt (PXN wt) or paxillin mutants PXN  
1100  $\Delta$ LIM4 and PXN-4A. Cells were starved overnight and seeded for 30 or 120 min,  
1101 respectively on the integrin  $\beta$ 3 ligand vitronectin in the absence of serum. Cells were  
1102 fixed and the cell membrane was stained with CellMask Orange. Scale bar represents  
1103 20  $\mu$ m. (F) Quantification of cell area from images (E). Shown are mean values with  
1104 95% confidence intervals from 3 independent experiments for 30min timepoint or from  
1105 2 independent experiments for 120 min timepoint. Sample sizes are given in brackets.  
1106 Statistical significance was calculated using one-way ANOVA followed by Bonferroni  
1107 Multiple Comparison Test (ns: not significant; \*\*\*  $p \leq 0.0001$ ; \*\*  $p \leq 0.01$ ).

1108

1109 **Figures**

**Baade et al. Figure 1**

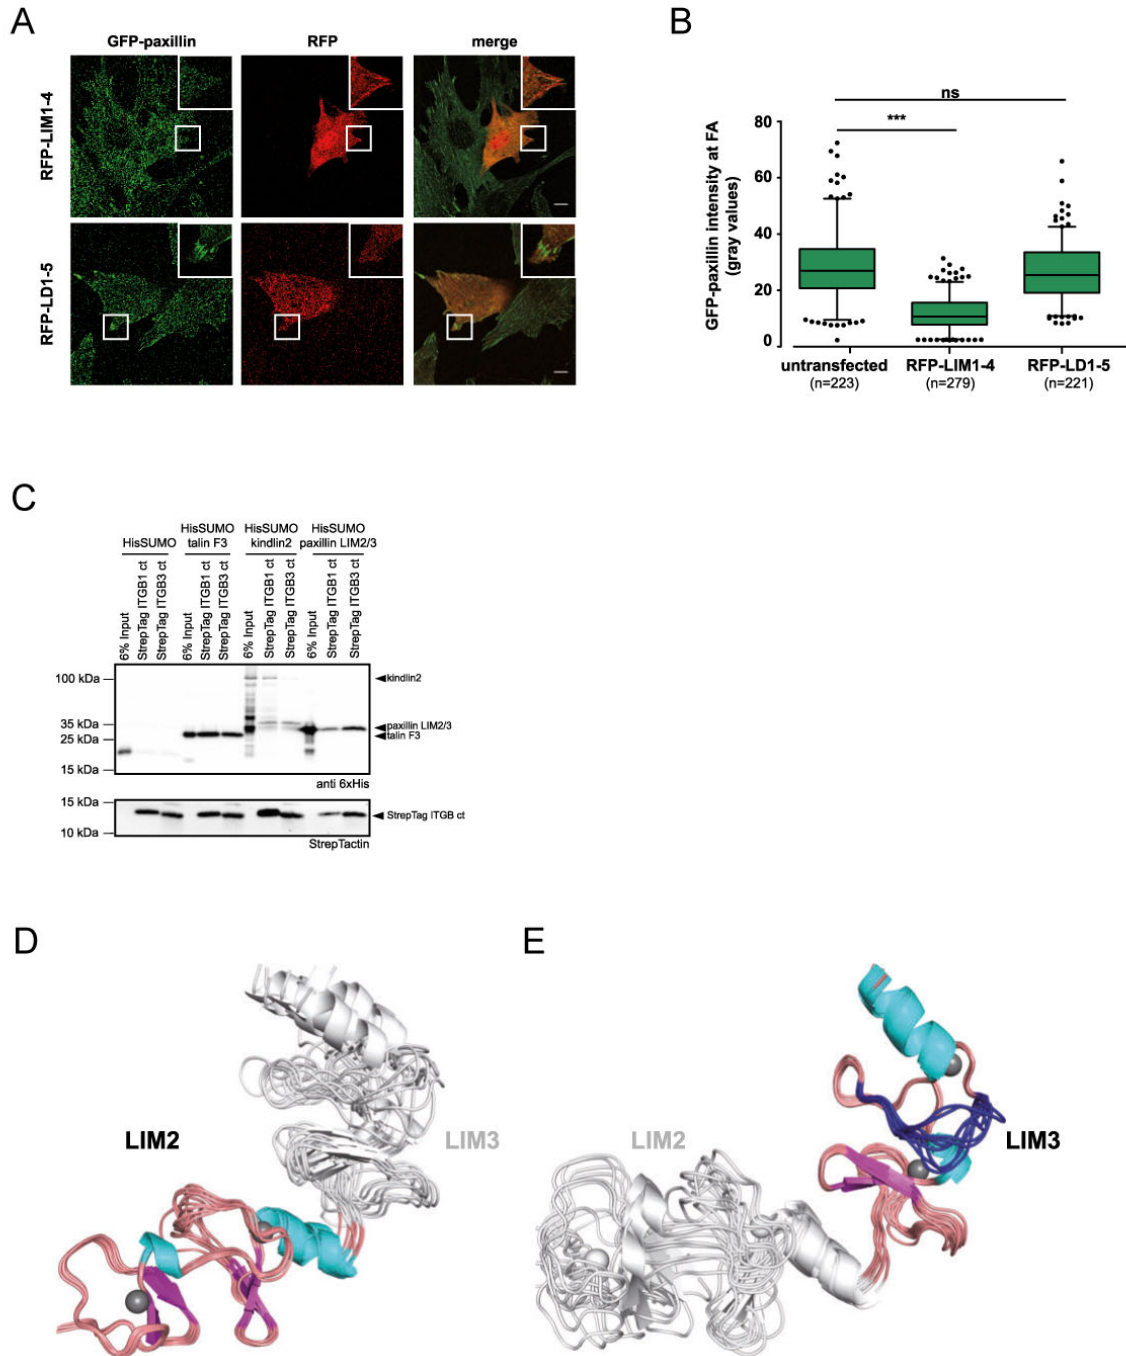

1110

1111



Baade et al. Figure 2

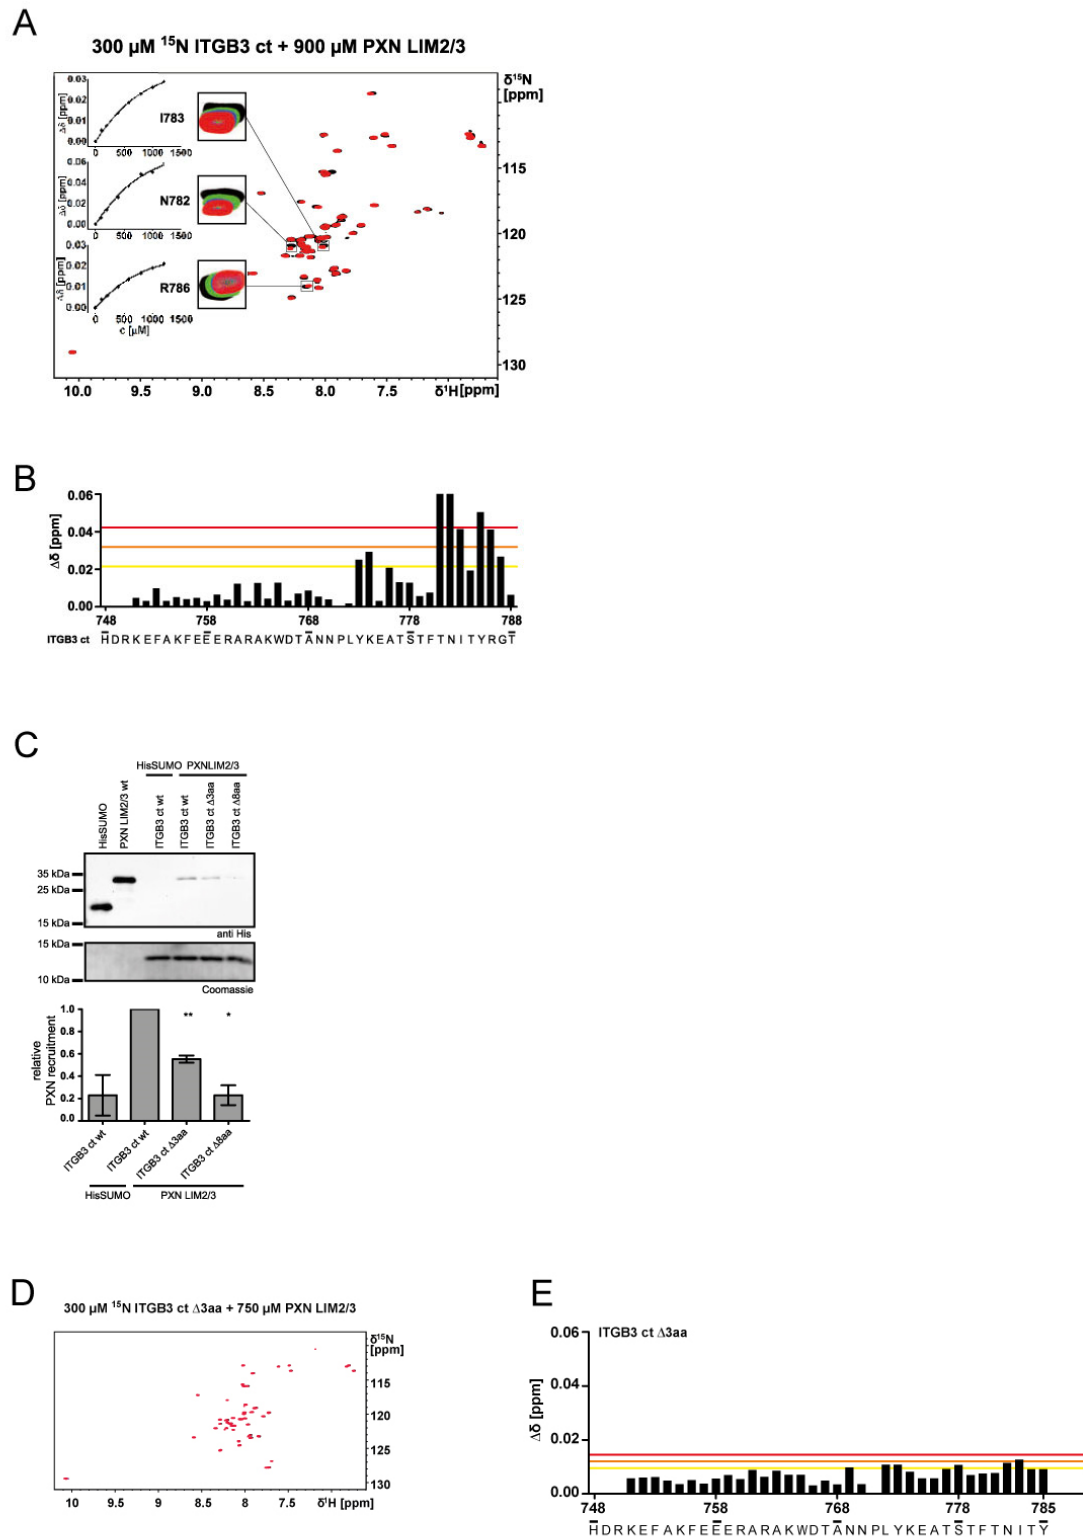

1112

1113

Baade et al. Figure 3

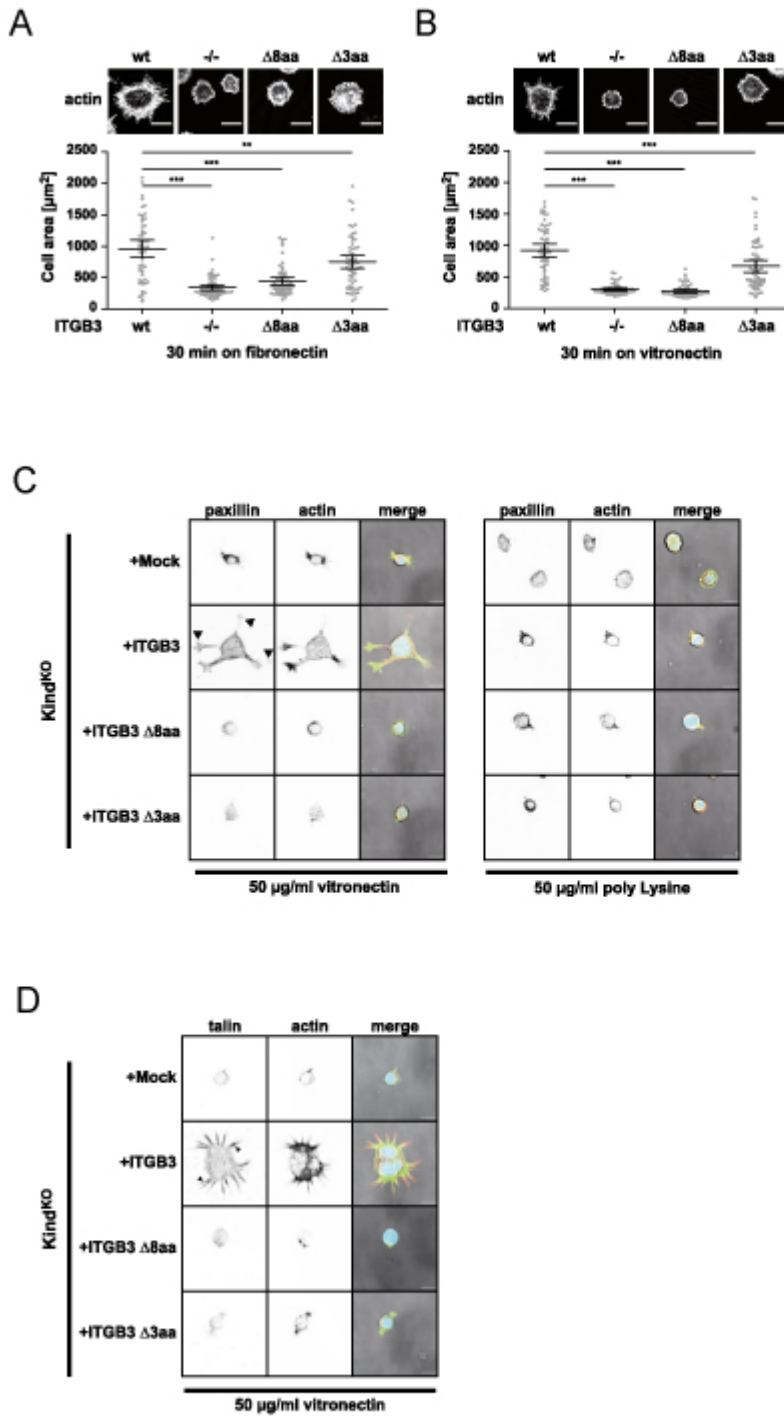

1114

1115

Baade et al. Figure 4

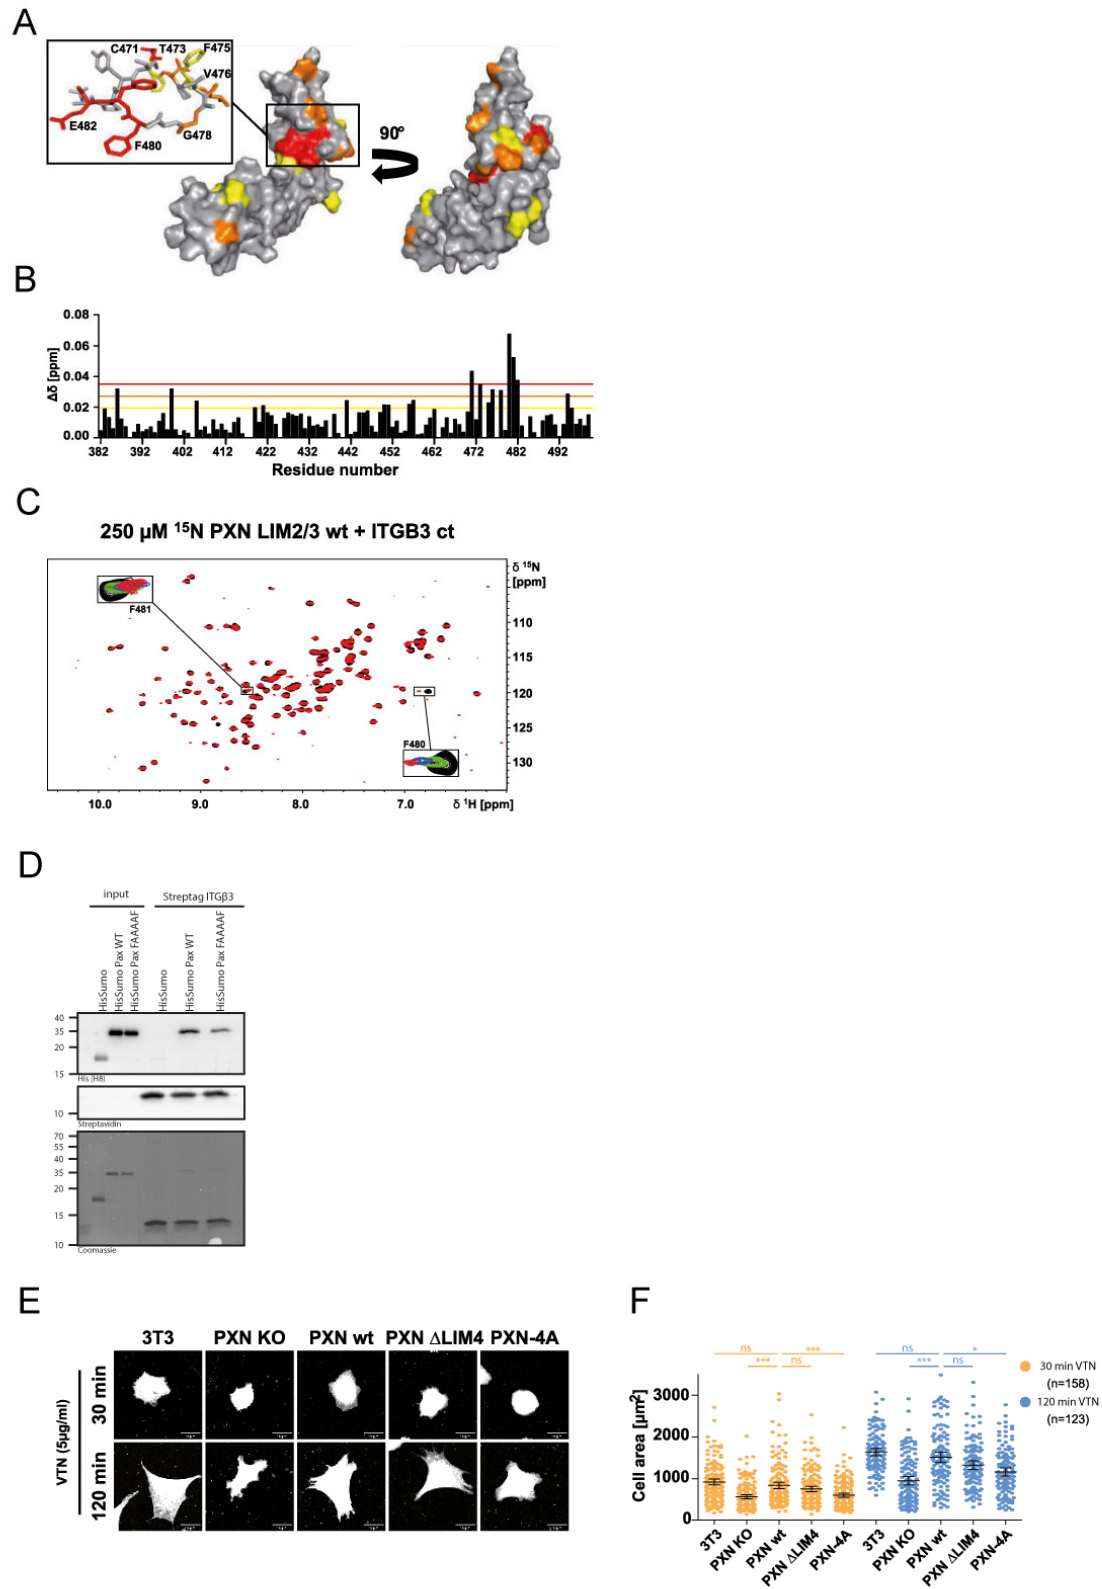

1116
